# Supplementary material
Source: PubMed Central journal article supplement (PMC3627827)

*Supporting Information*

Synthesis of (*S*)-FTY720 vinylphosphonate analogues and evaluation of their potential as sphingosine kinase 1 inhibitors and activators

Zheng Liu<sup>a</sup>, Neil MacRitchie<sup>b</sup>, Susan Pyne<sup>b</sup>, Nigel J. Pyne<sup>b</sup>, and Robert Bittman<sup>a, \*</sup>

<sup>a</sup>*Department of Chemistry and Biochemistry, Queens College, The City University of New York, Flushing, New York 11367-1597*

<sup>b</sup>*Cell Biology Group, Strathclyde Institute of Pharmacy and Biomedical Science, University of Strathclyde, Glasgow, United Kingdom G4 0RE*

---

\* Corresponding author. Tel.: (+1)718-997-3279; fax: (+1)718-997-3349; e-mail: robert.bittman@qc.cuny.edu

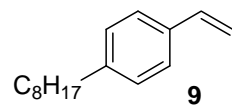

$^1\text{H NMR}$

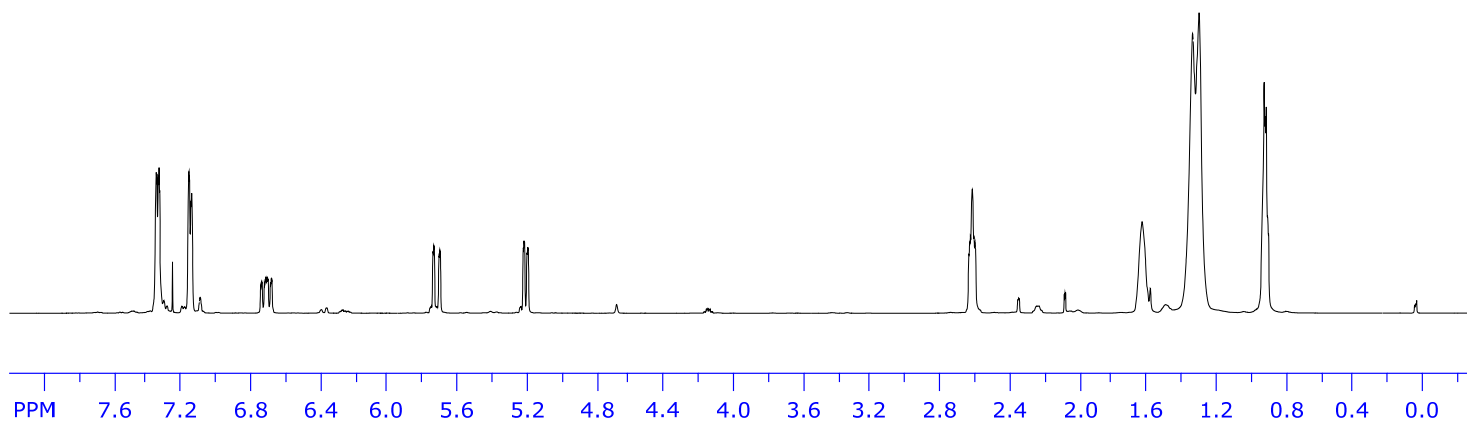

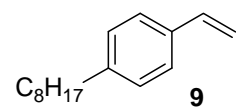

<sup>13</sup>C NMR

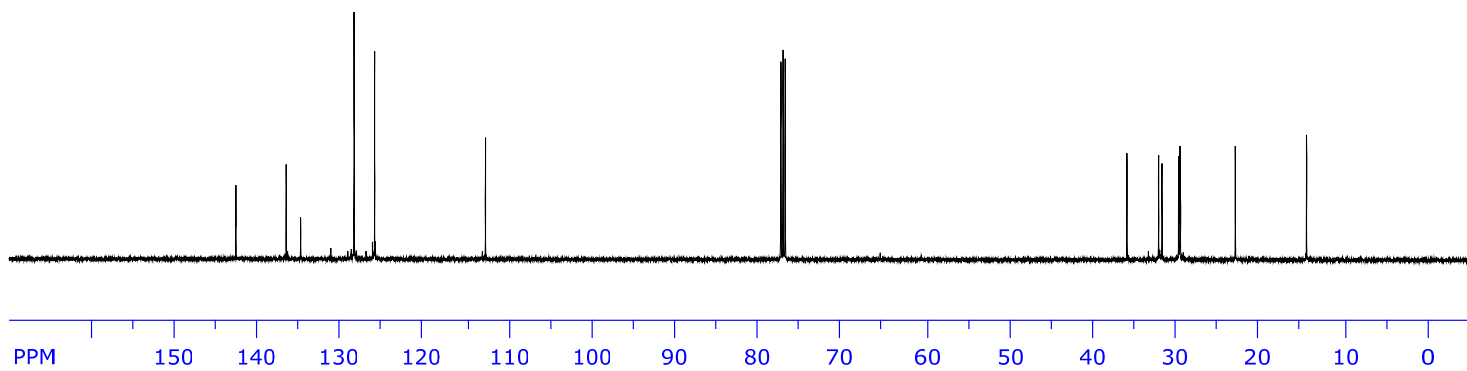

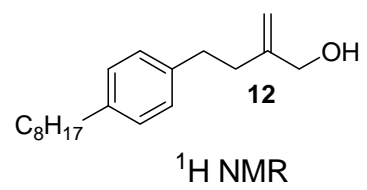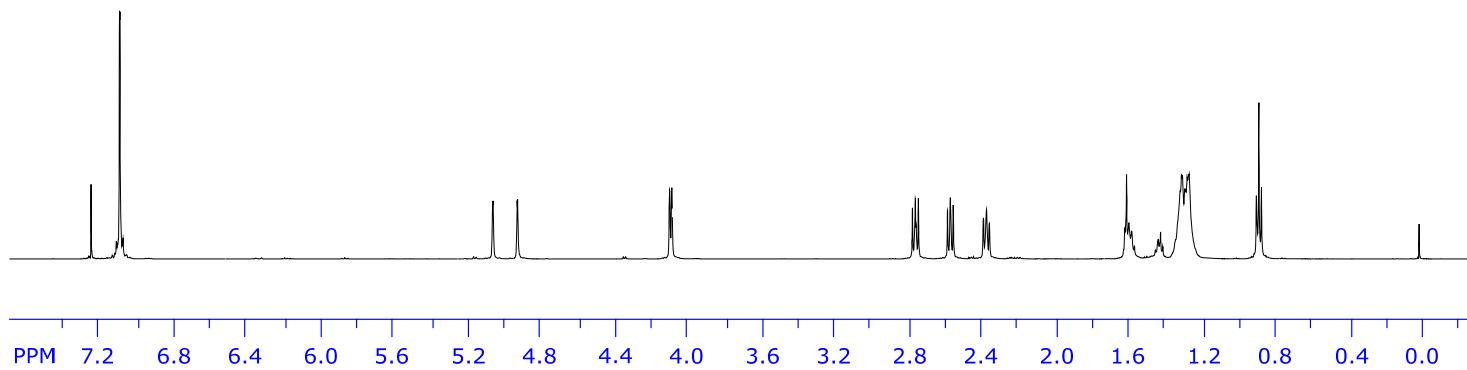

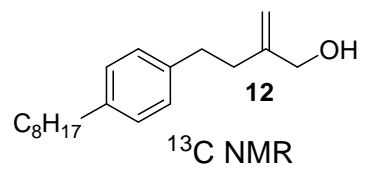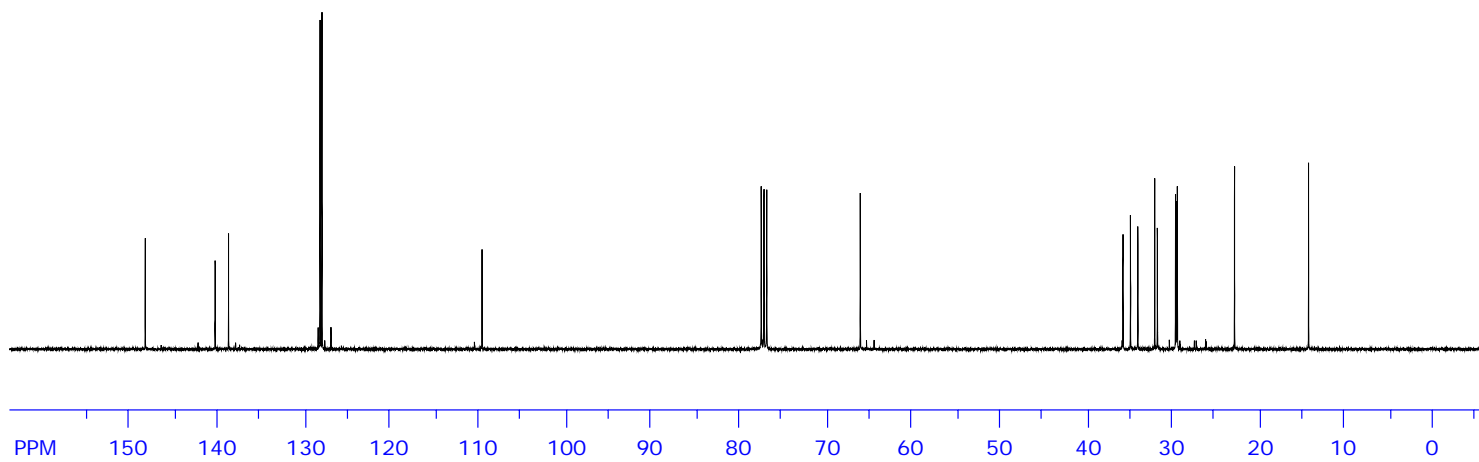

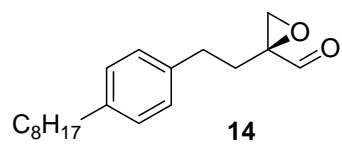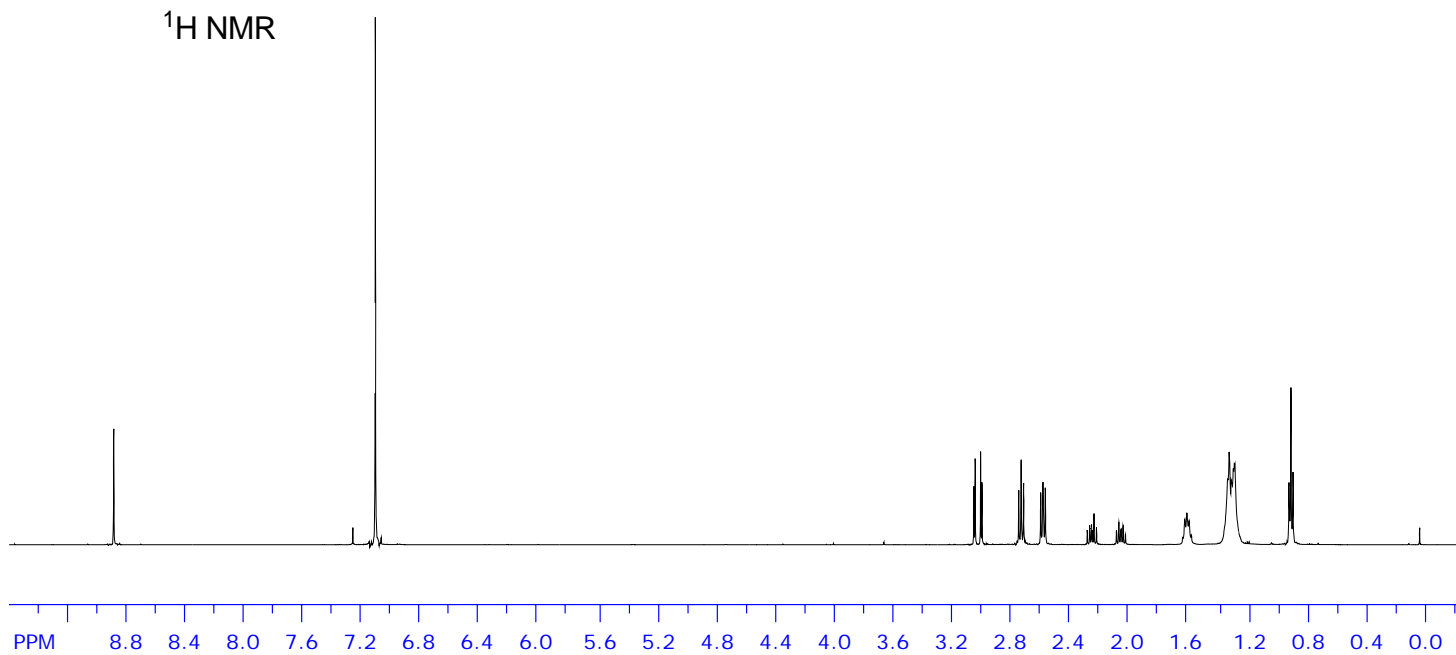

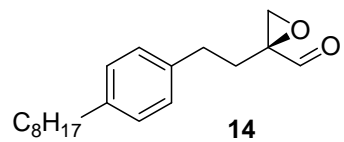

$^{13}\text{C}$  NMR

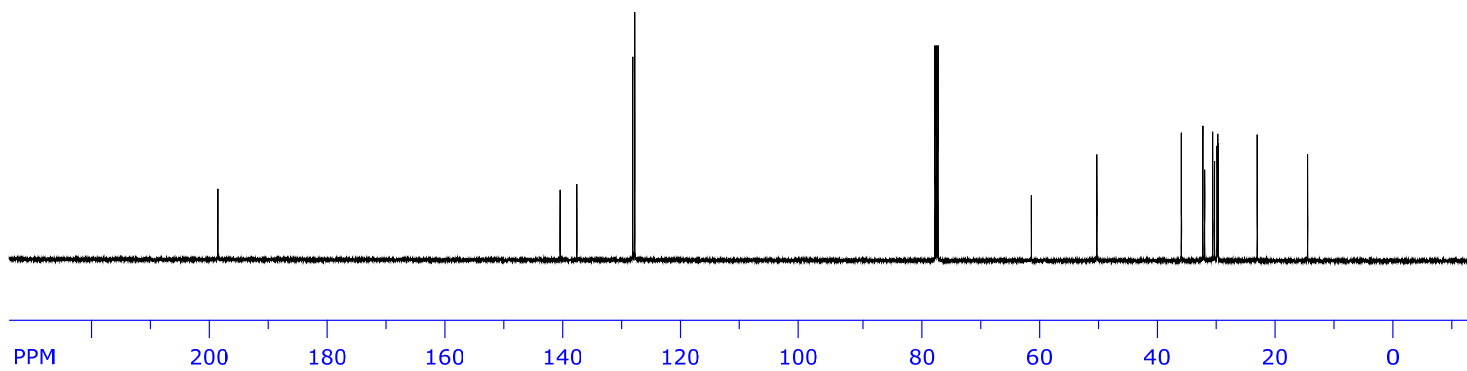

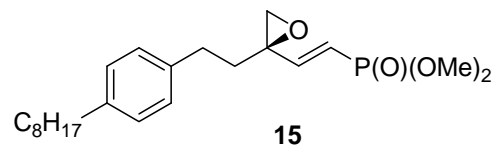

$^1\text{H NMR}$

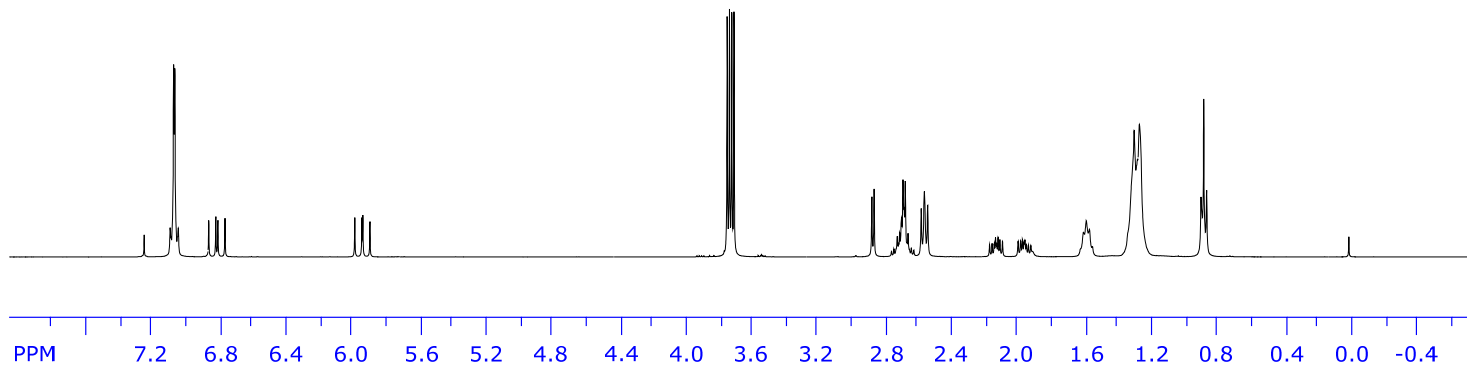



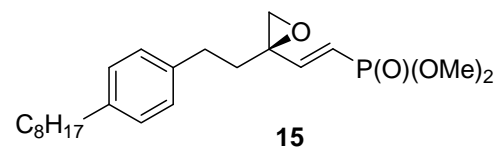

<sup>13</sup>C NMR

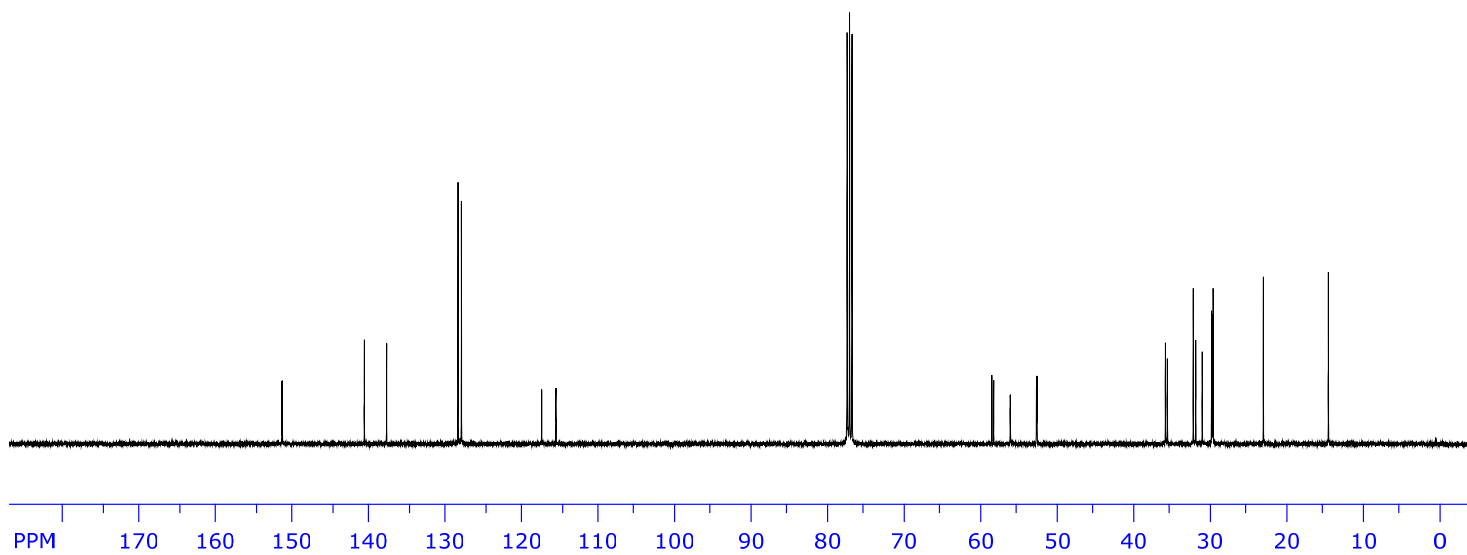

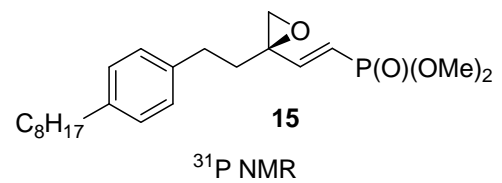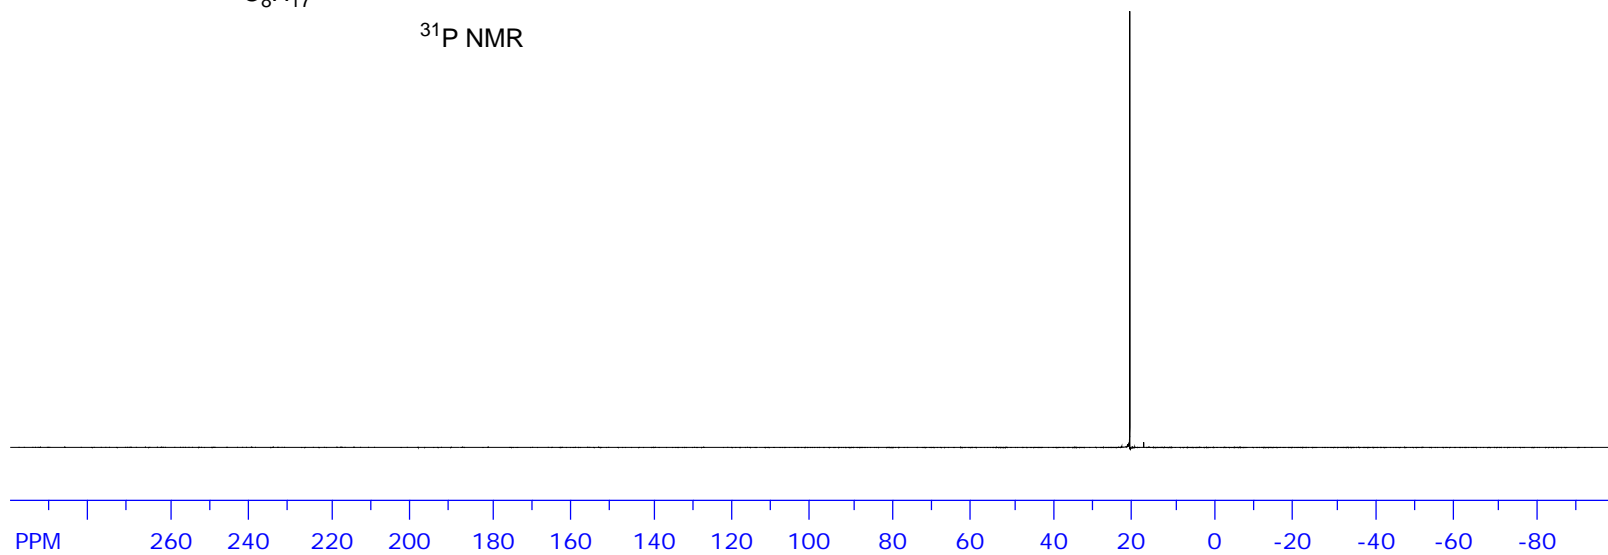

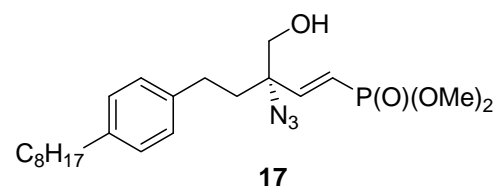

<sup>1</sup>H NMR

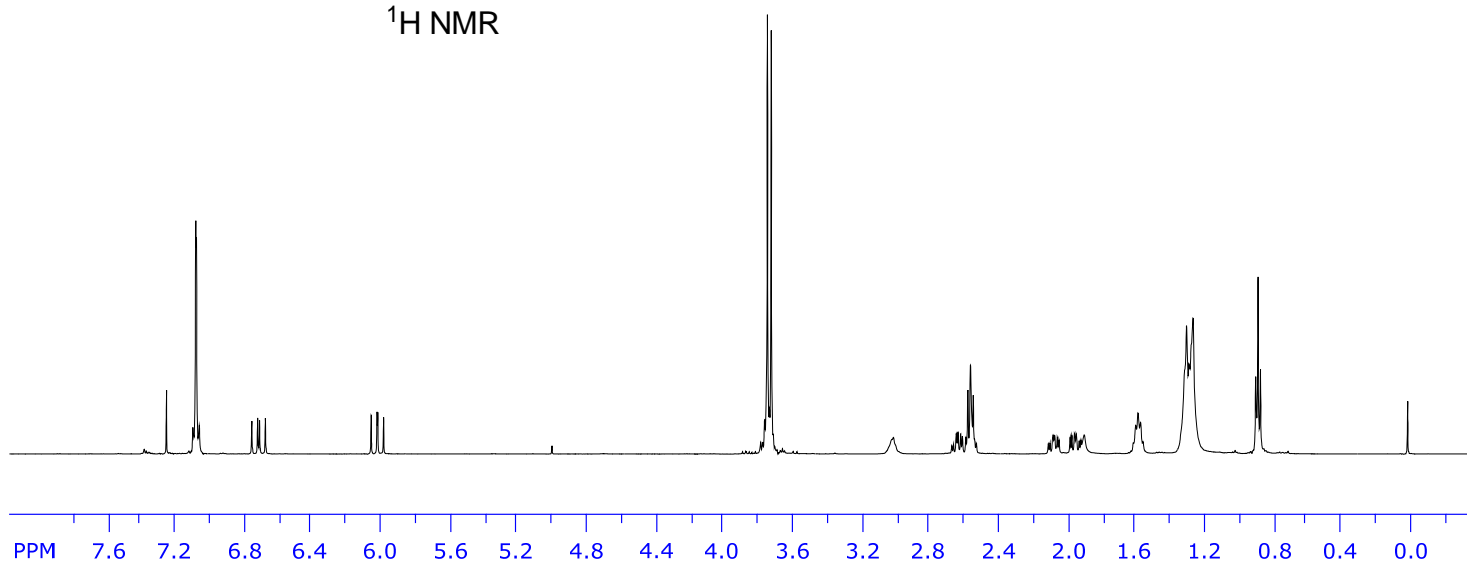

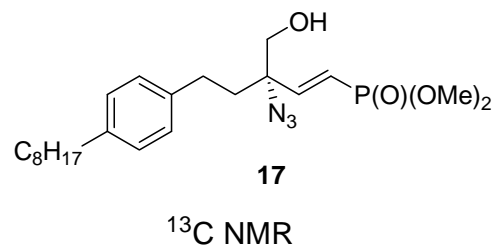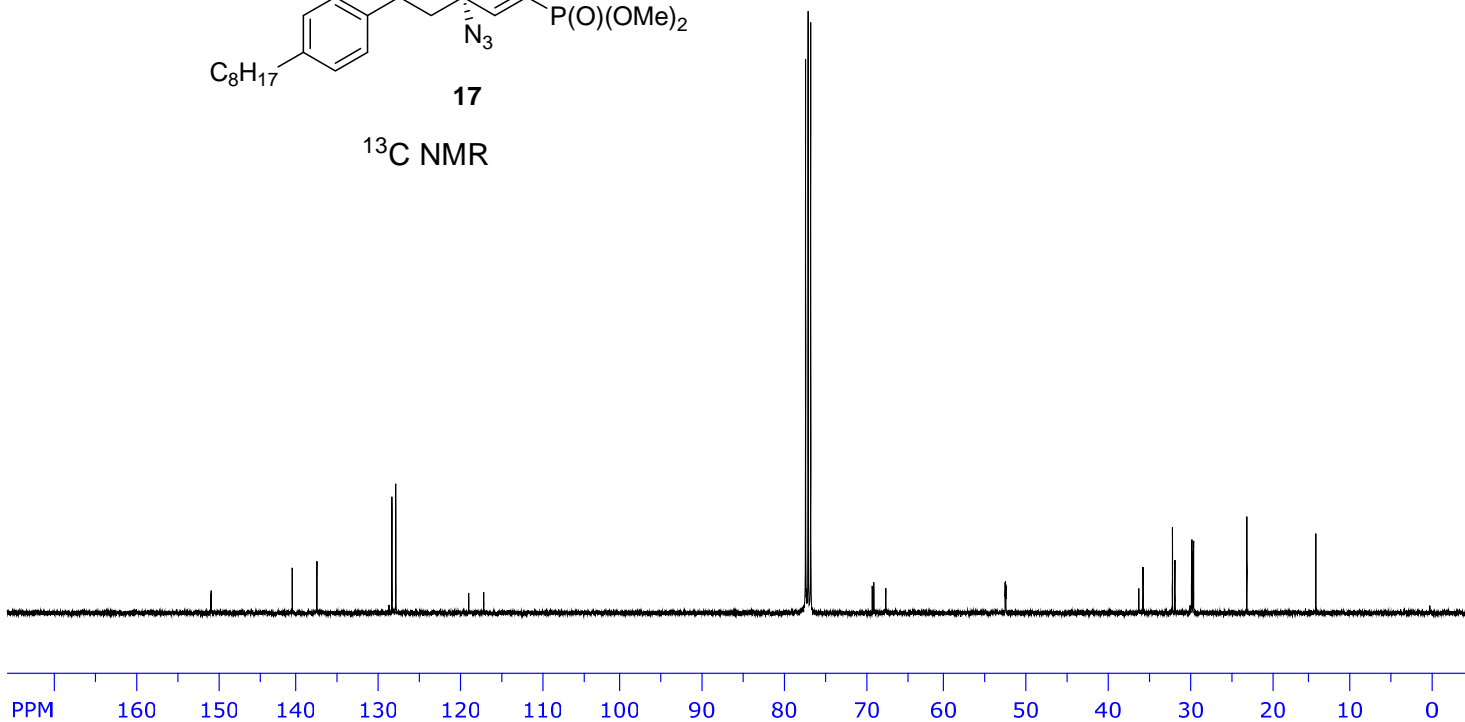

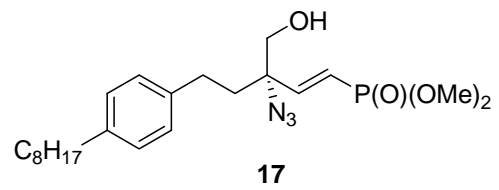

DEPT 135

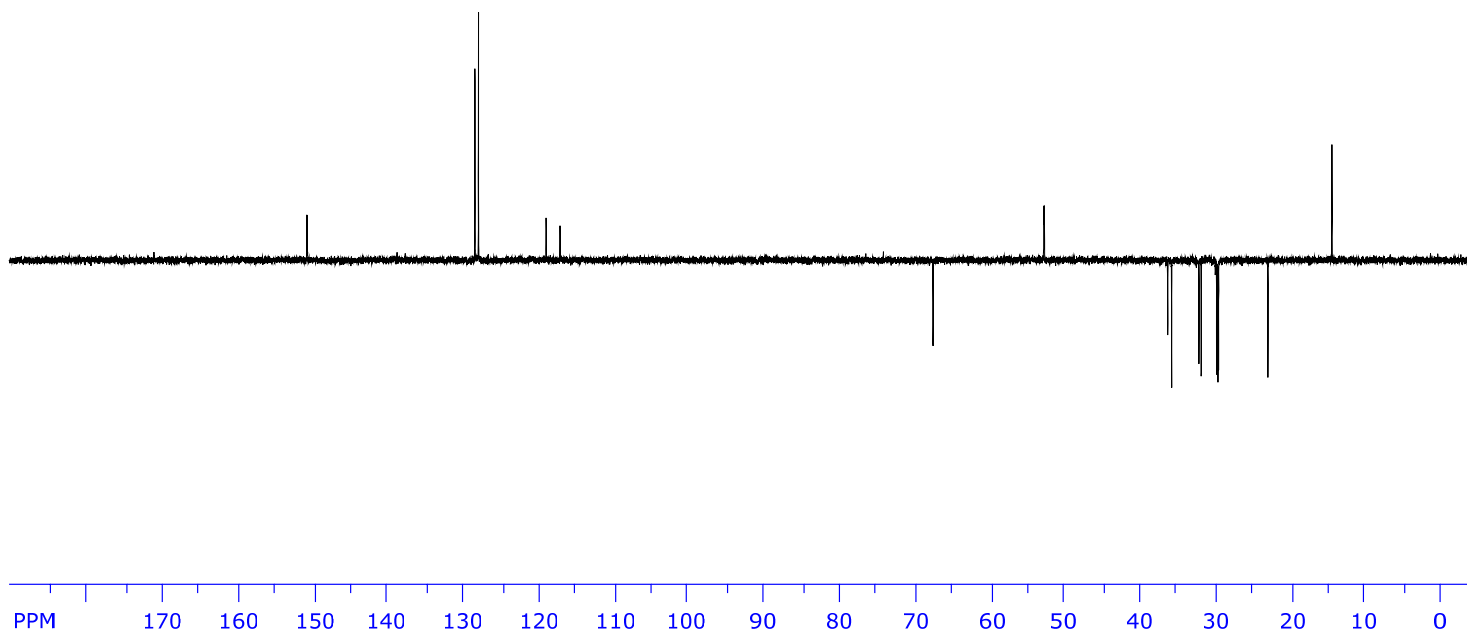

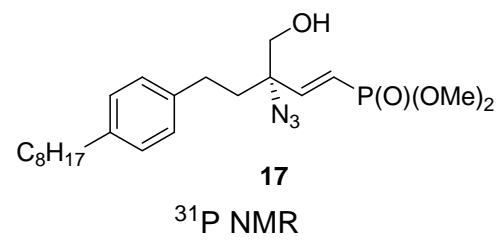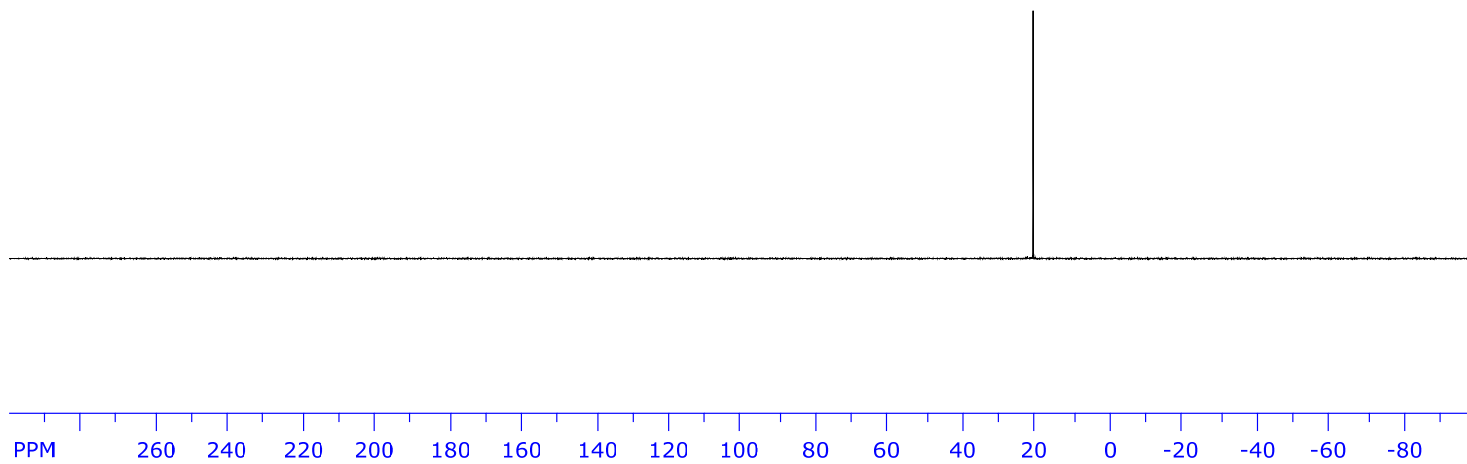

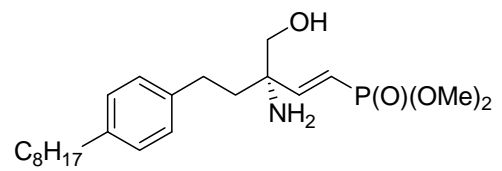

**22**

<sup>1</sup>H NMR

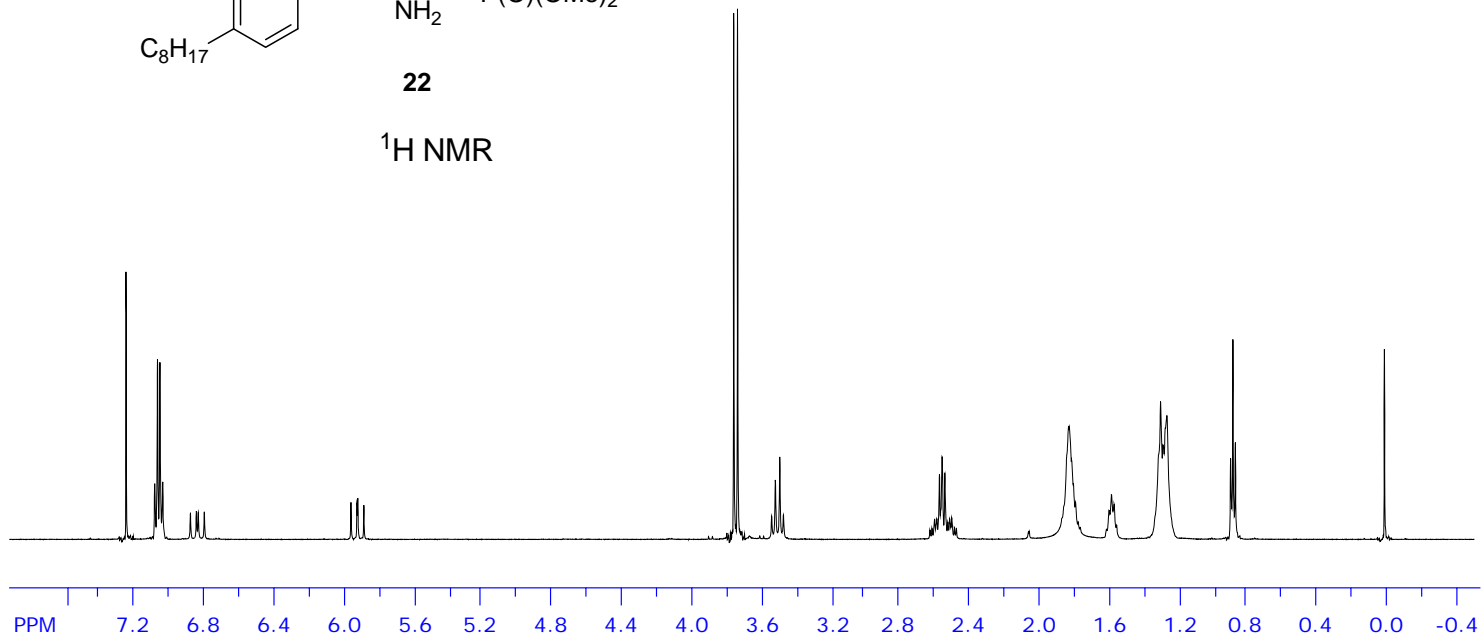

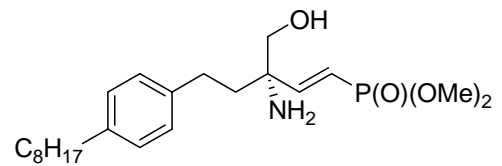

**22**  
<sup>13</sup>C NMR

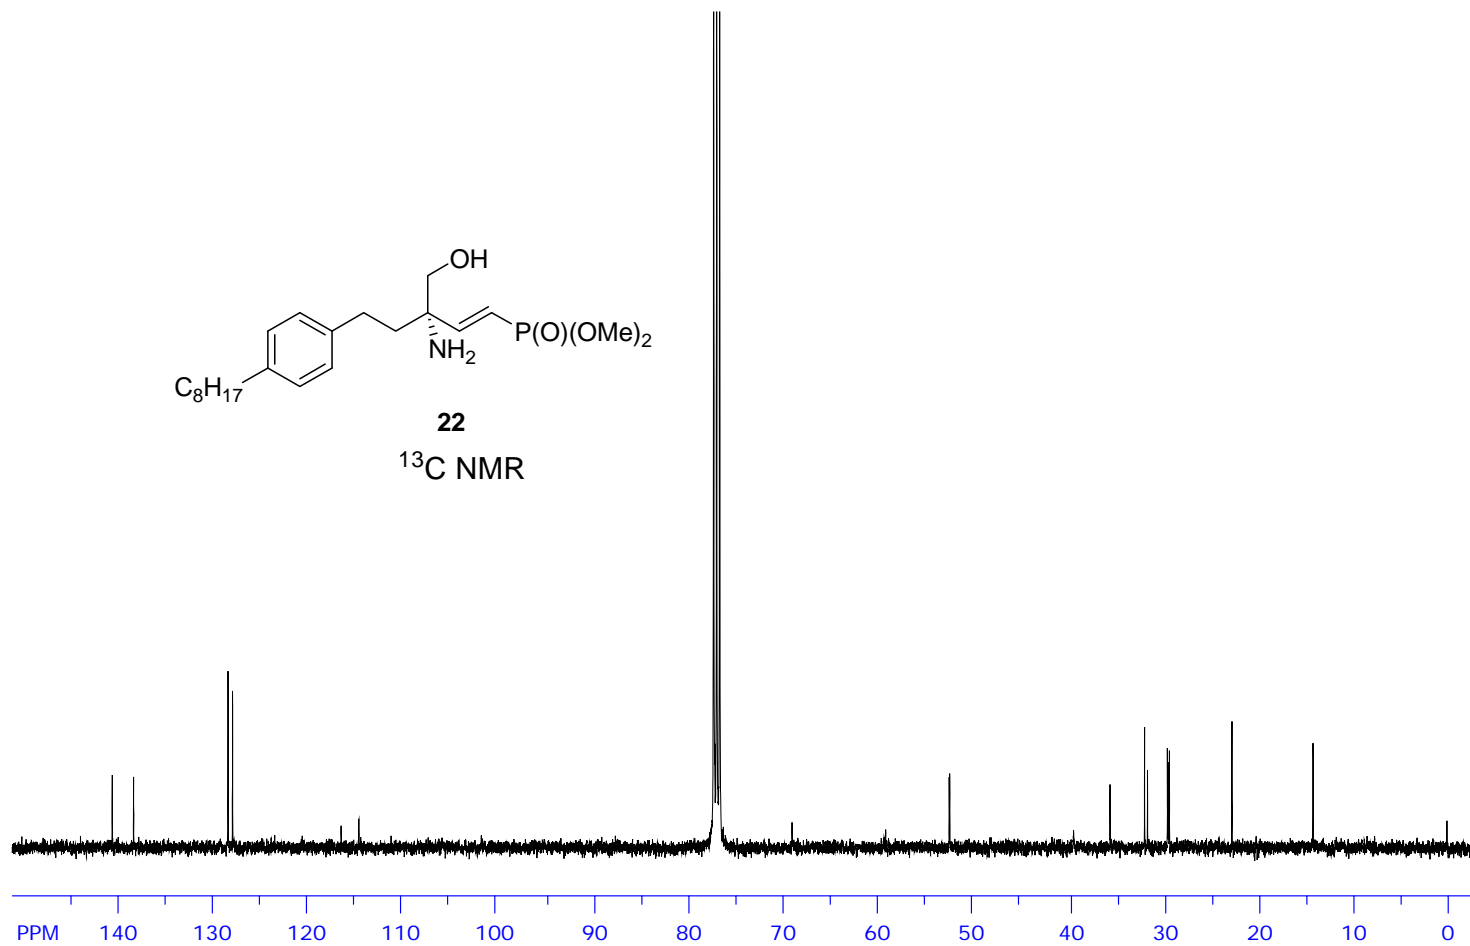



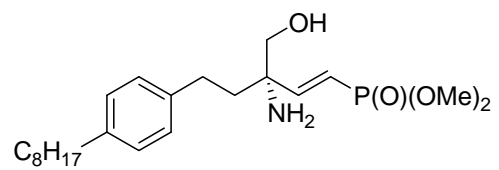

**22**

<sup>31</sup>P NMR

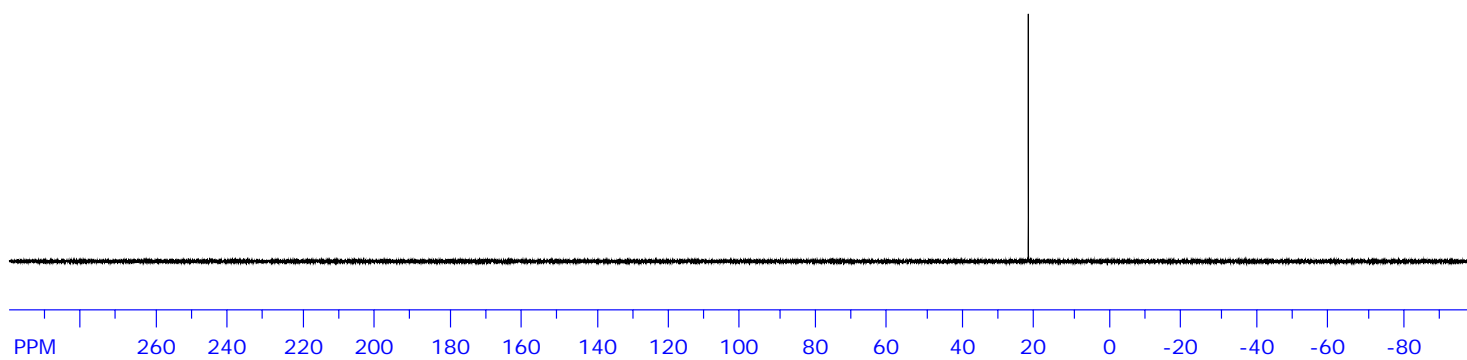

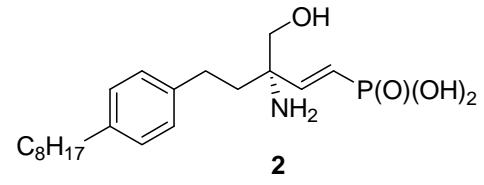

<sup>1</sup>H NMR

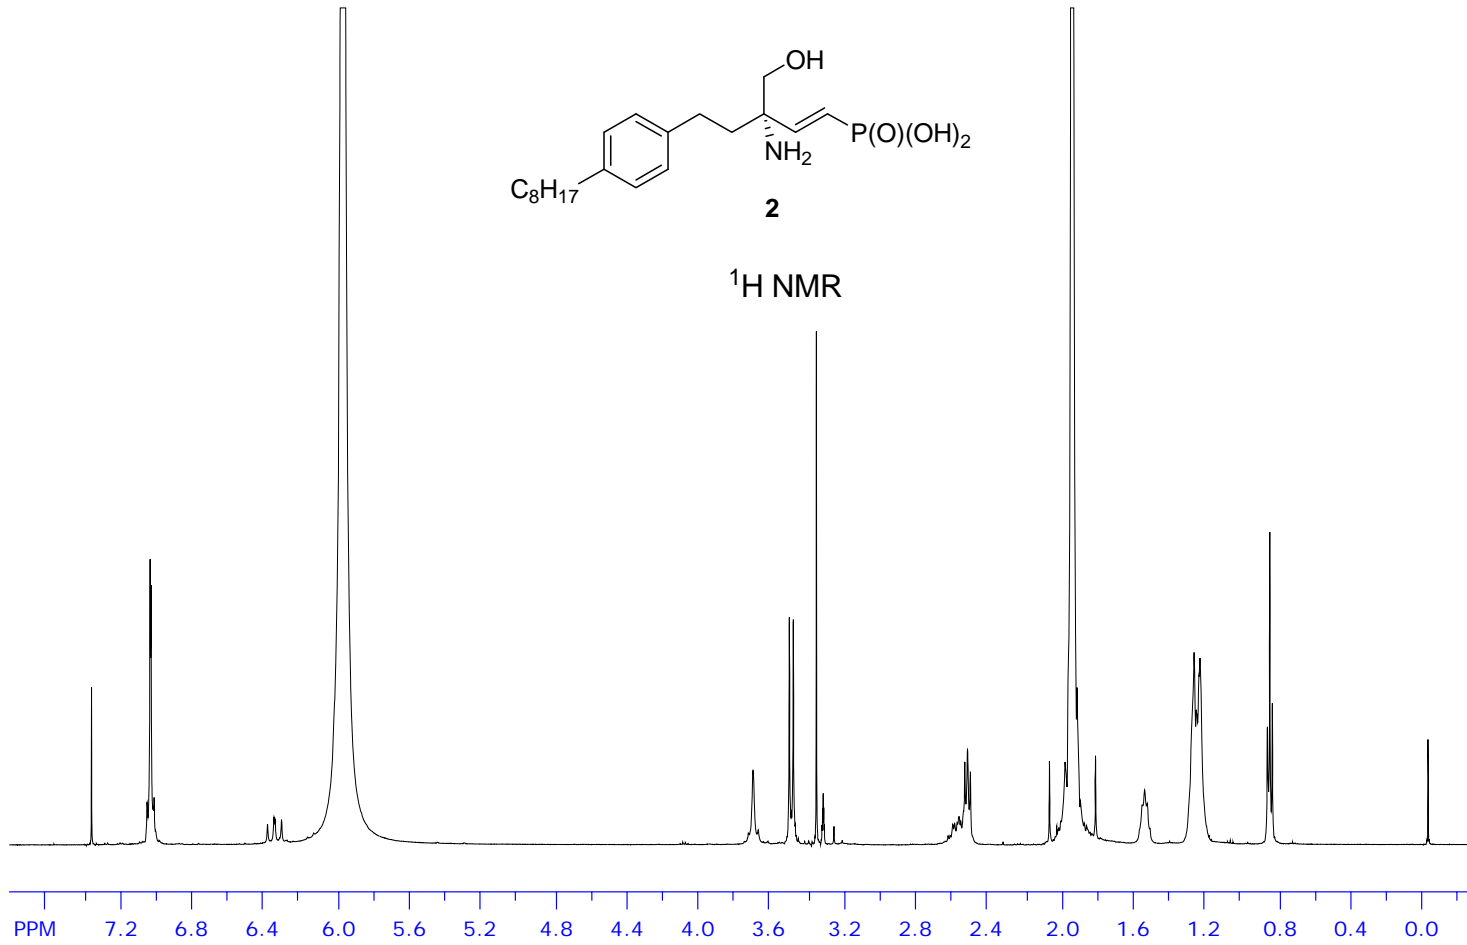

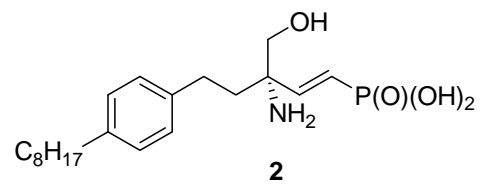

<sup>13</sup>C NMR

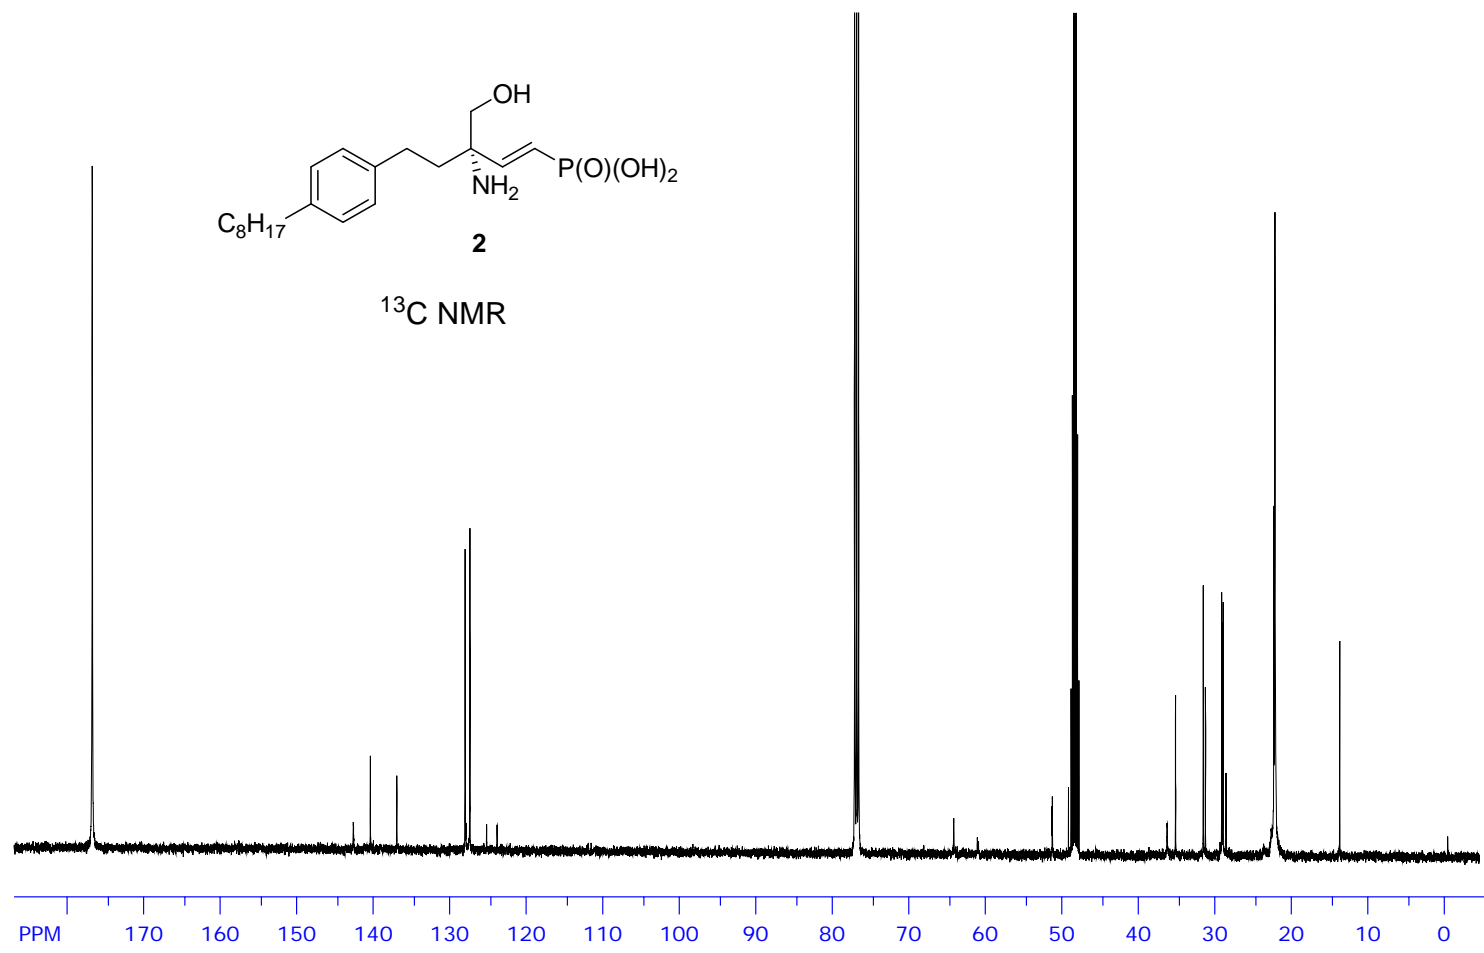

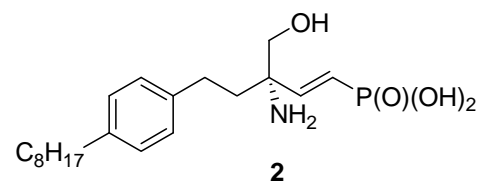

<sup>31</sup>P NMR

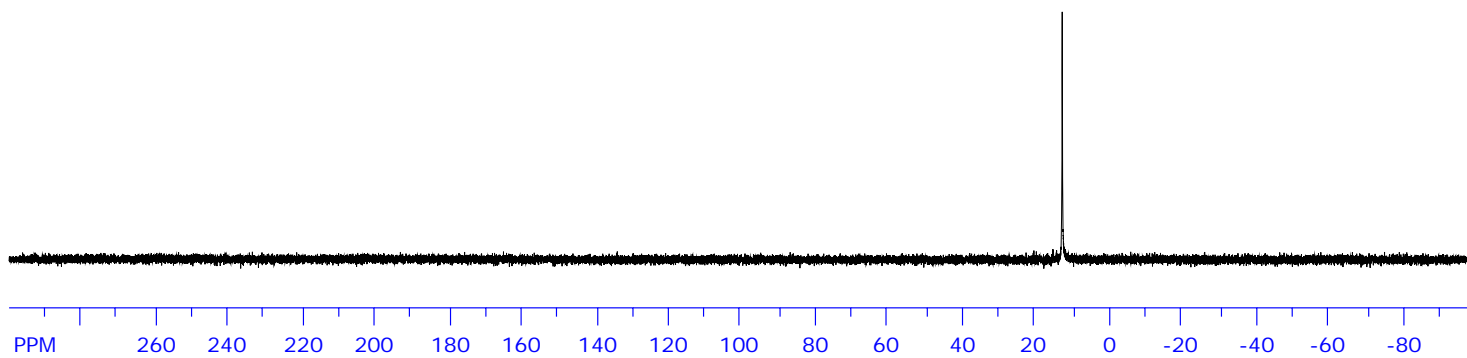

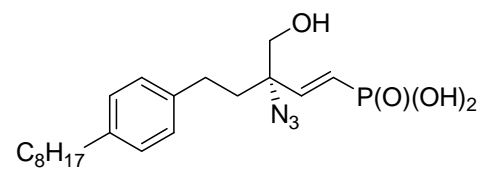

5

<sup>1</sup>H NMR

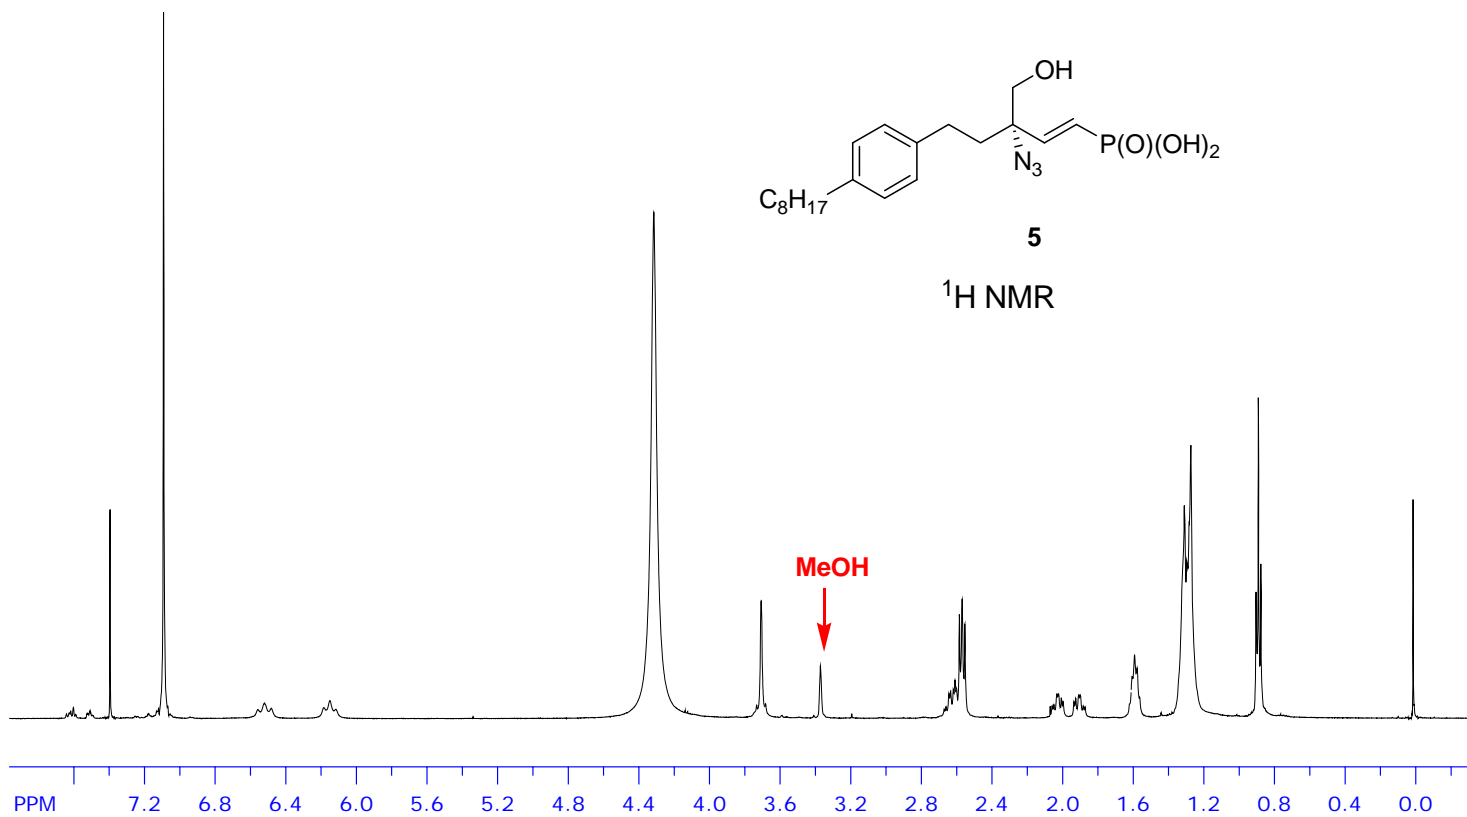

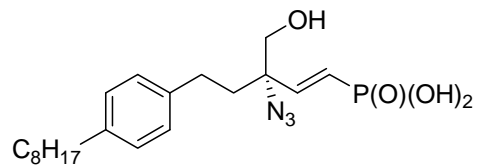

5

<sup>13</sup>C NMR

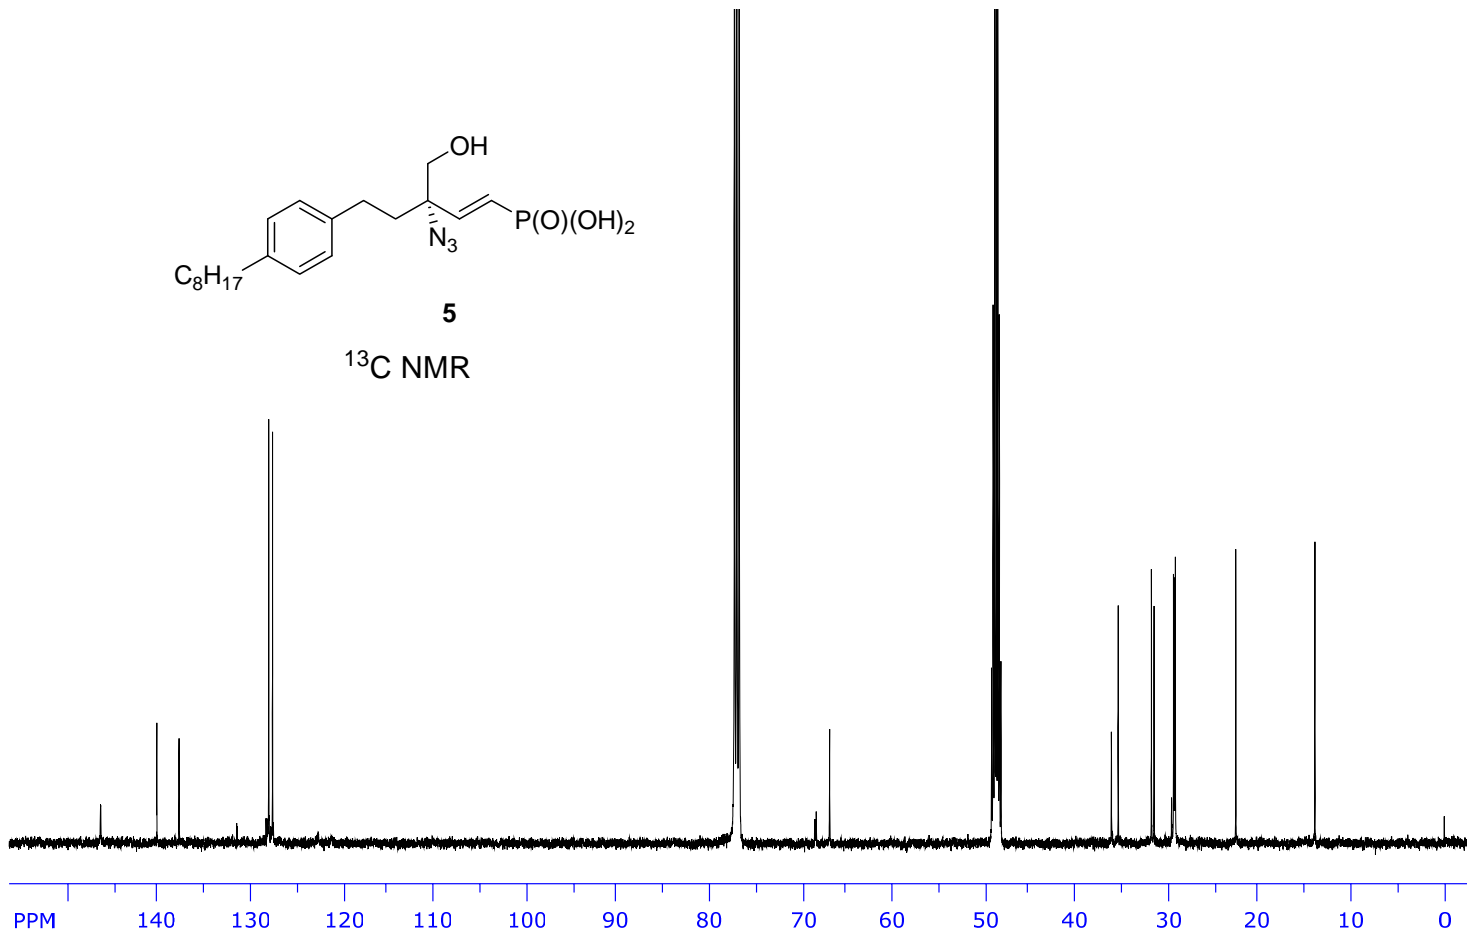

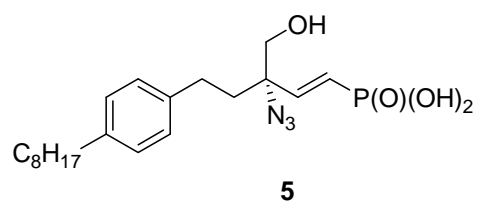

<sup>31</sup>P NMR

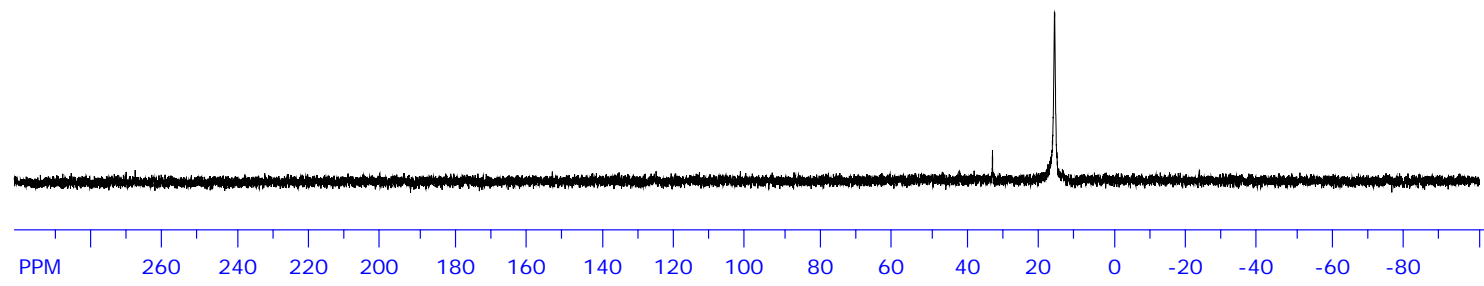

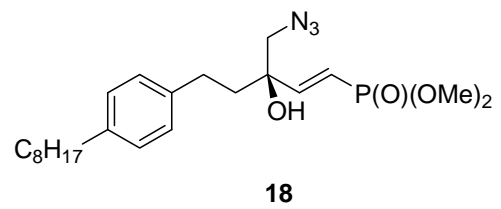

<sup>1</sup>H NMR

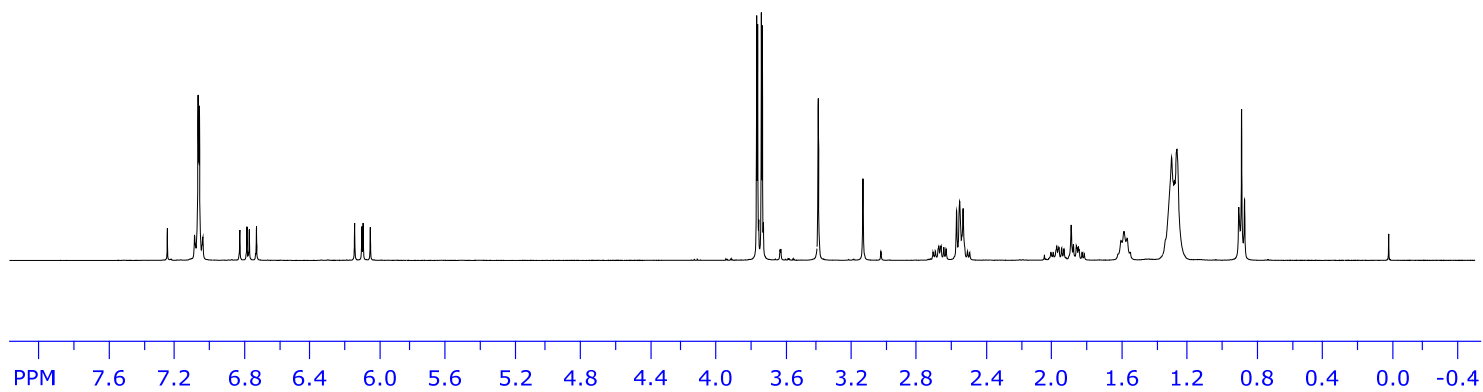



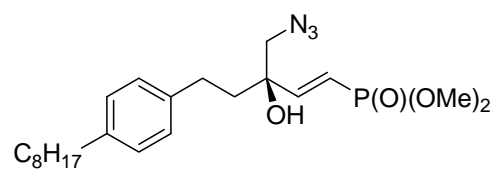

18

<sup>13</sup>C NMR

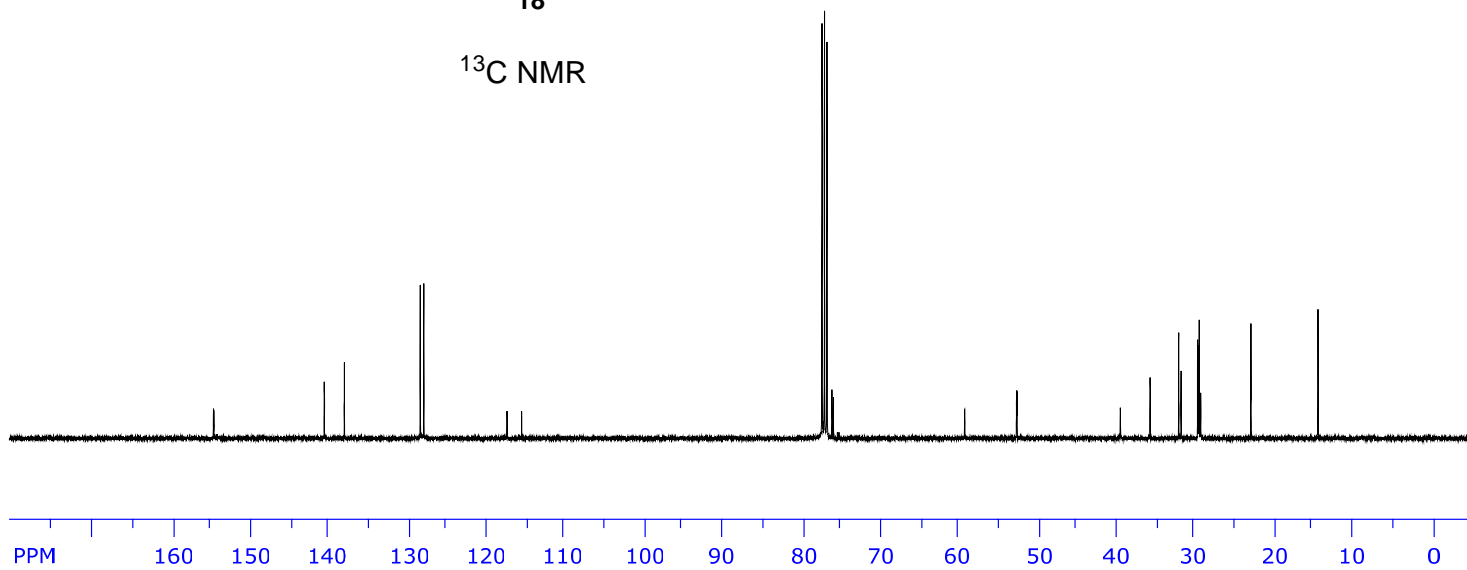

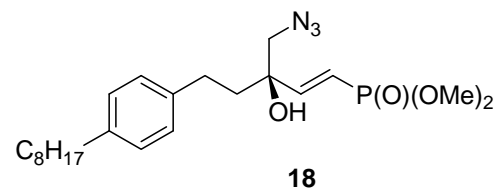

DEPT 135

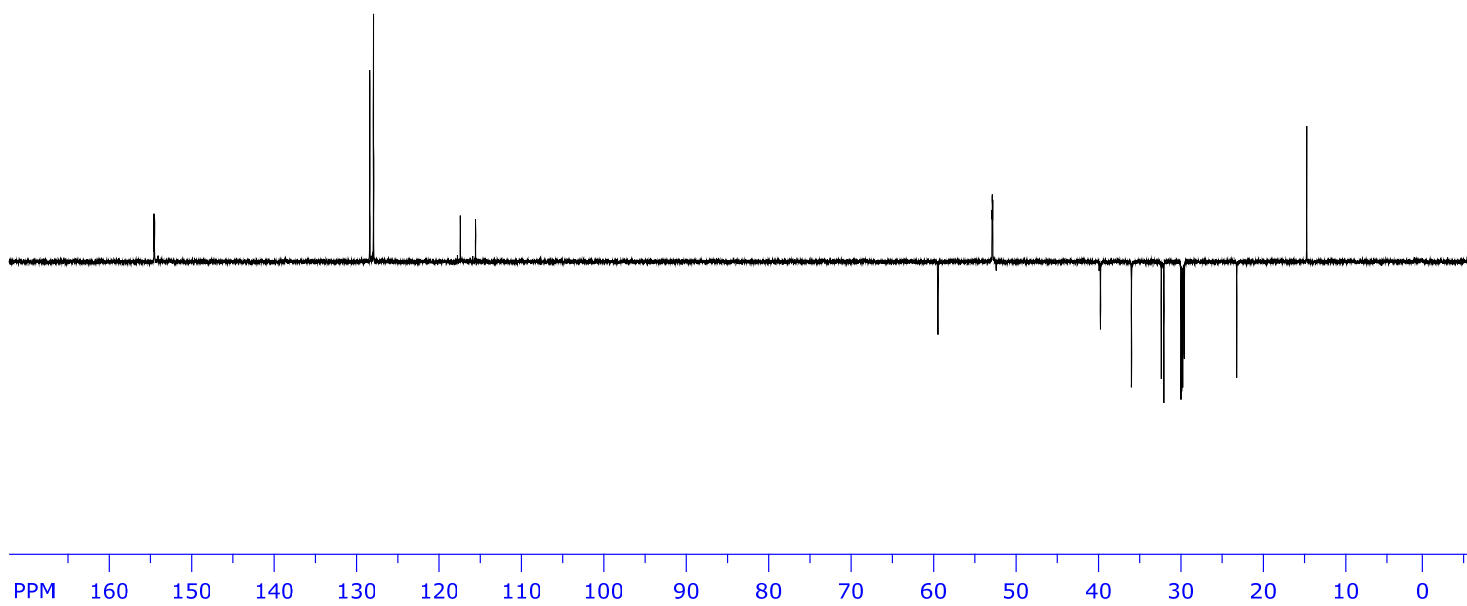

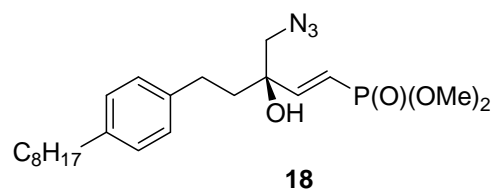

$^{31}\text{P}$  NMR

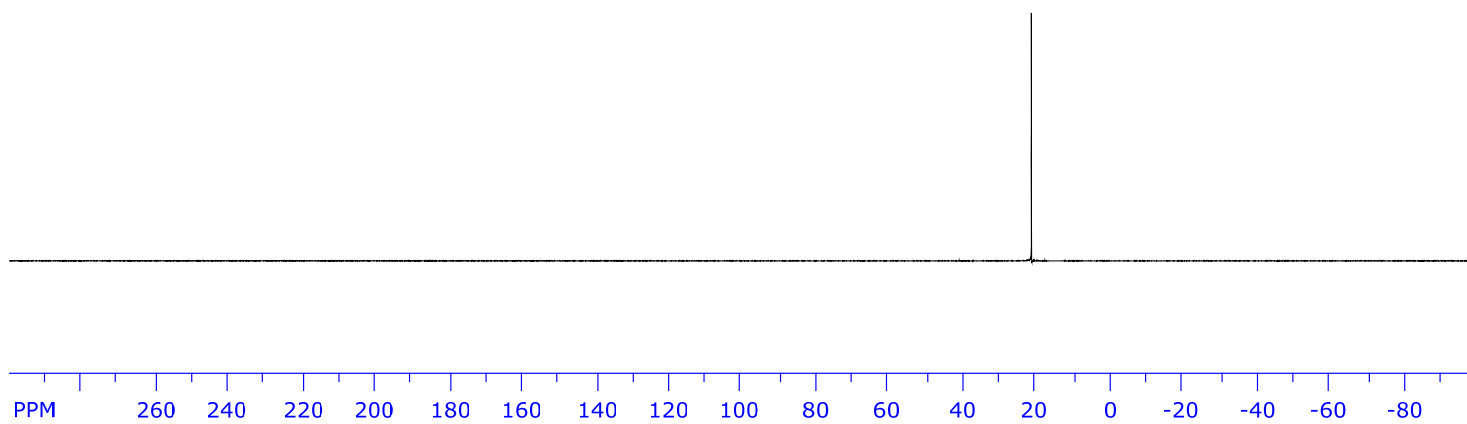

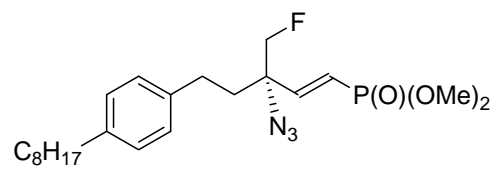

**23**  
<sup>1</sup>H NMR

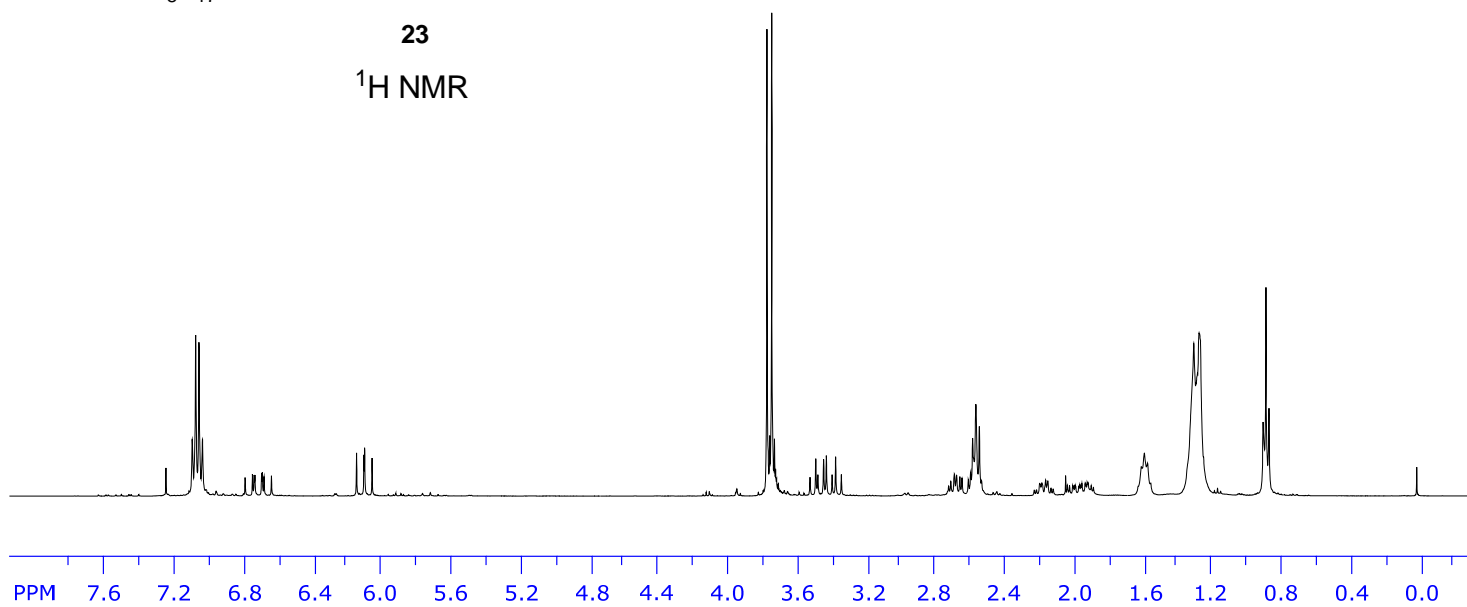

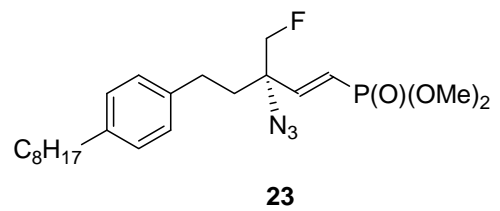

<sup>13</sup>C NMR

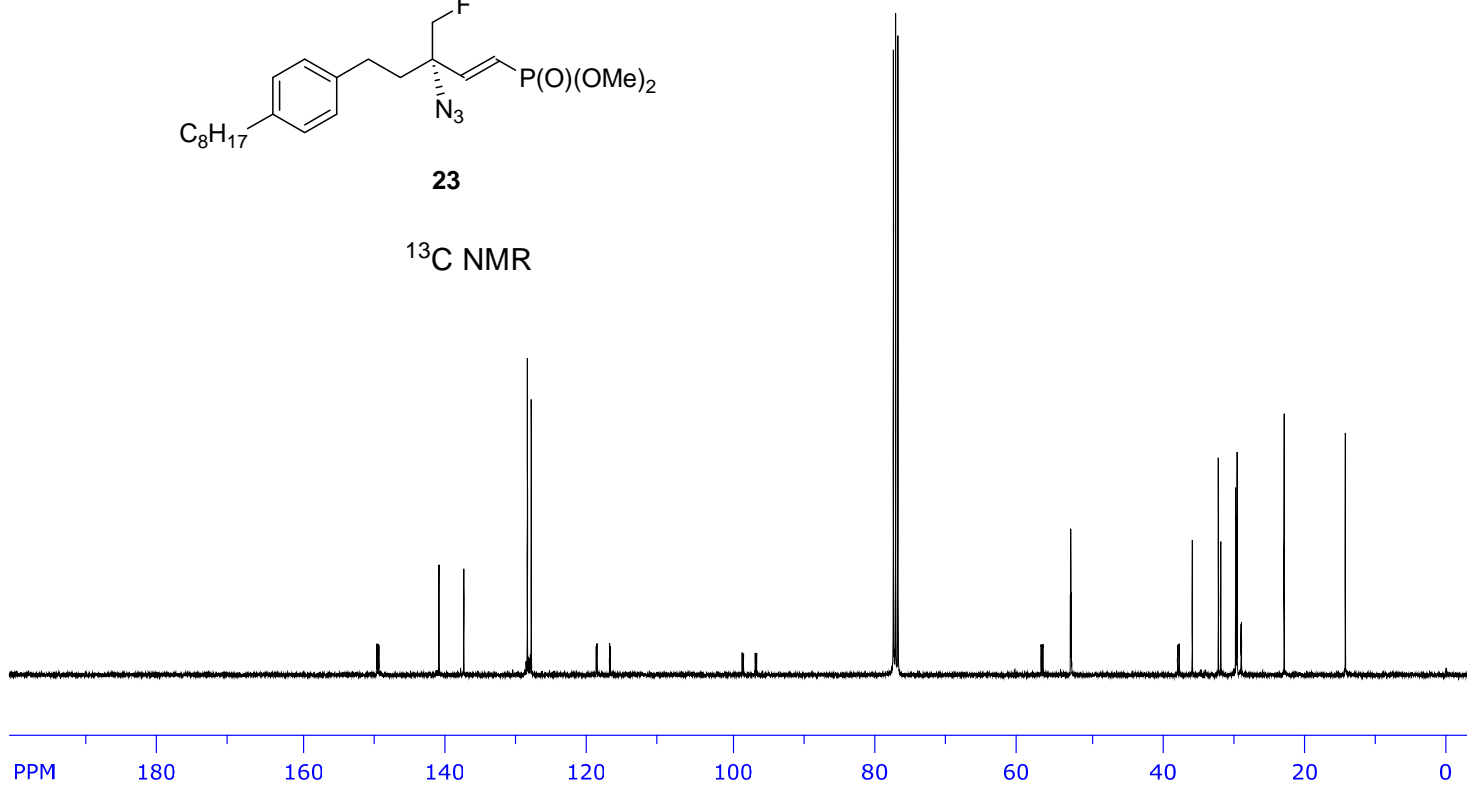

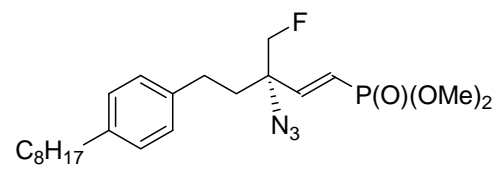

23

<sup>19</sup>F NMR

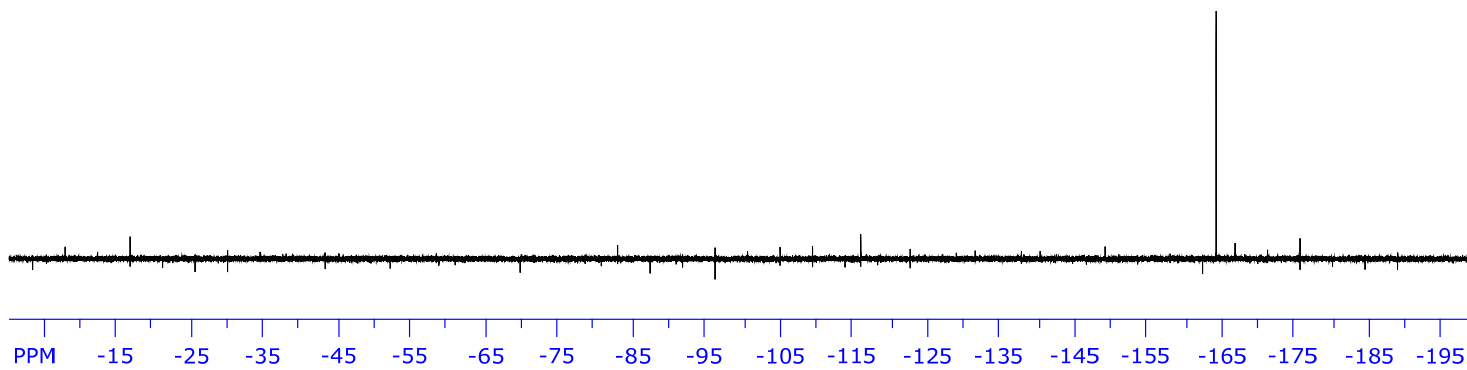

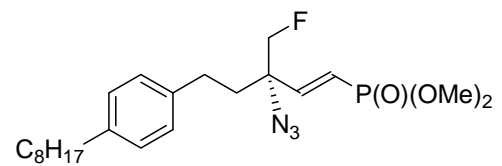

**23**

<sup>31</sup>P NMR

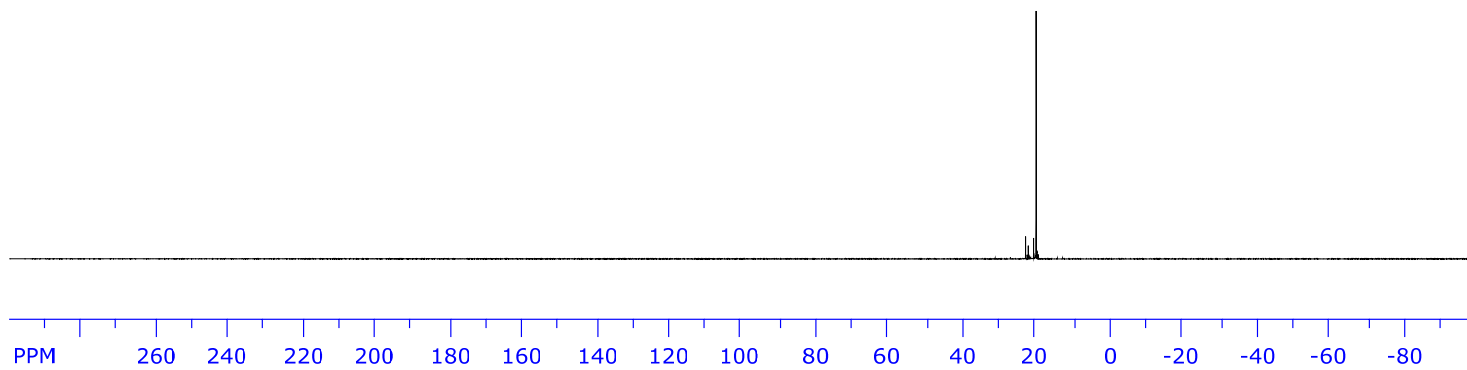

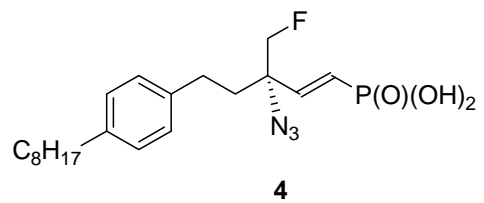

<sup>1</sup>H NMR

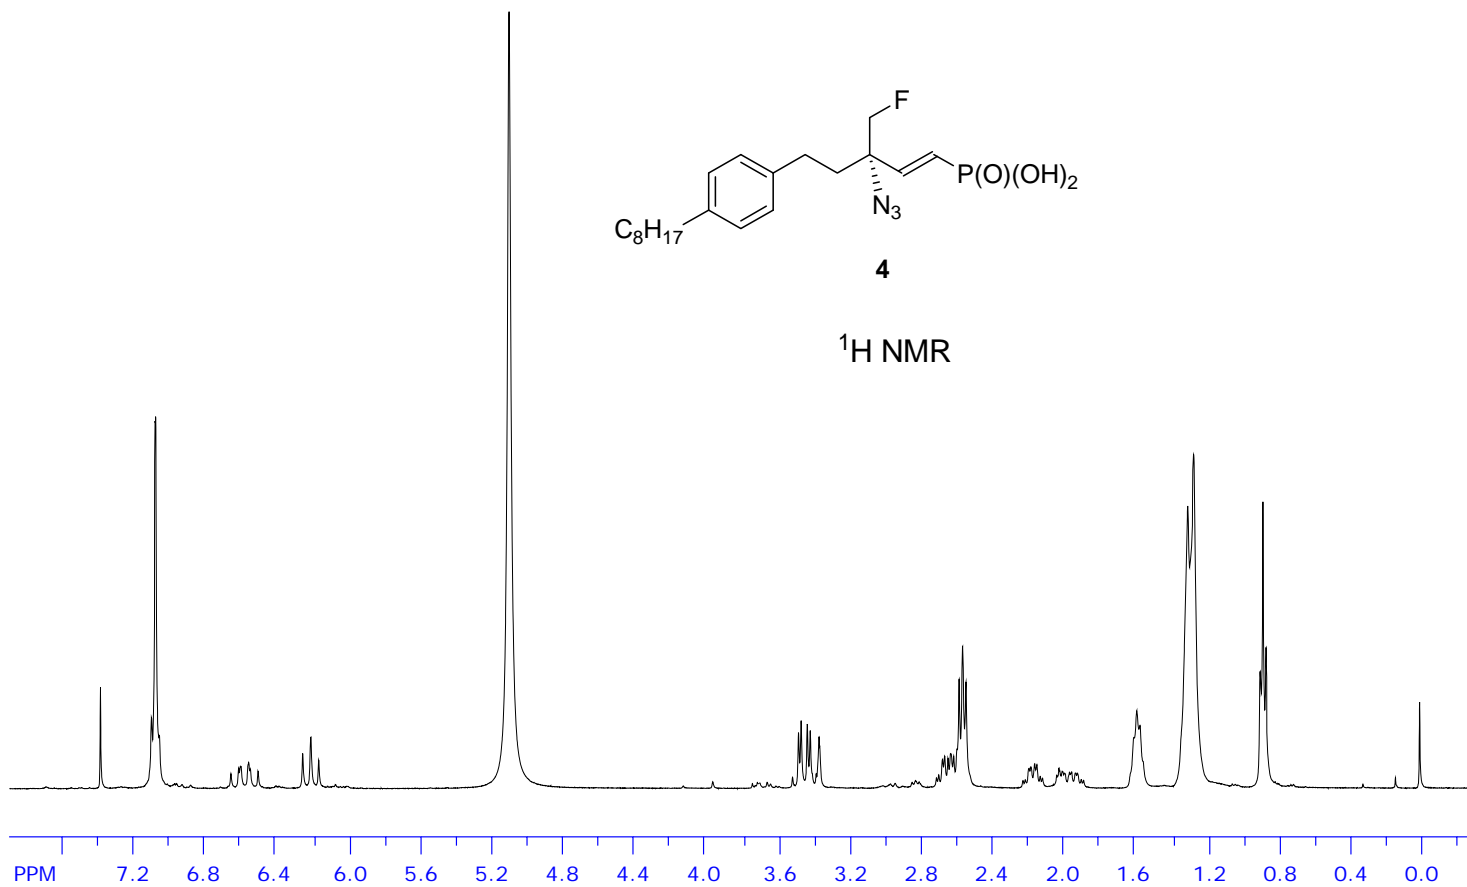



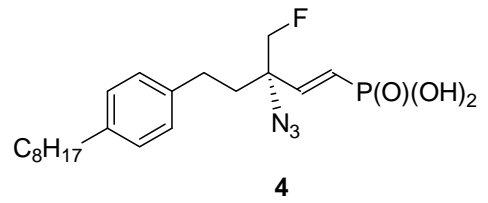

$^{13}\text{C}$  NMR

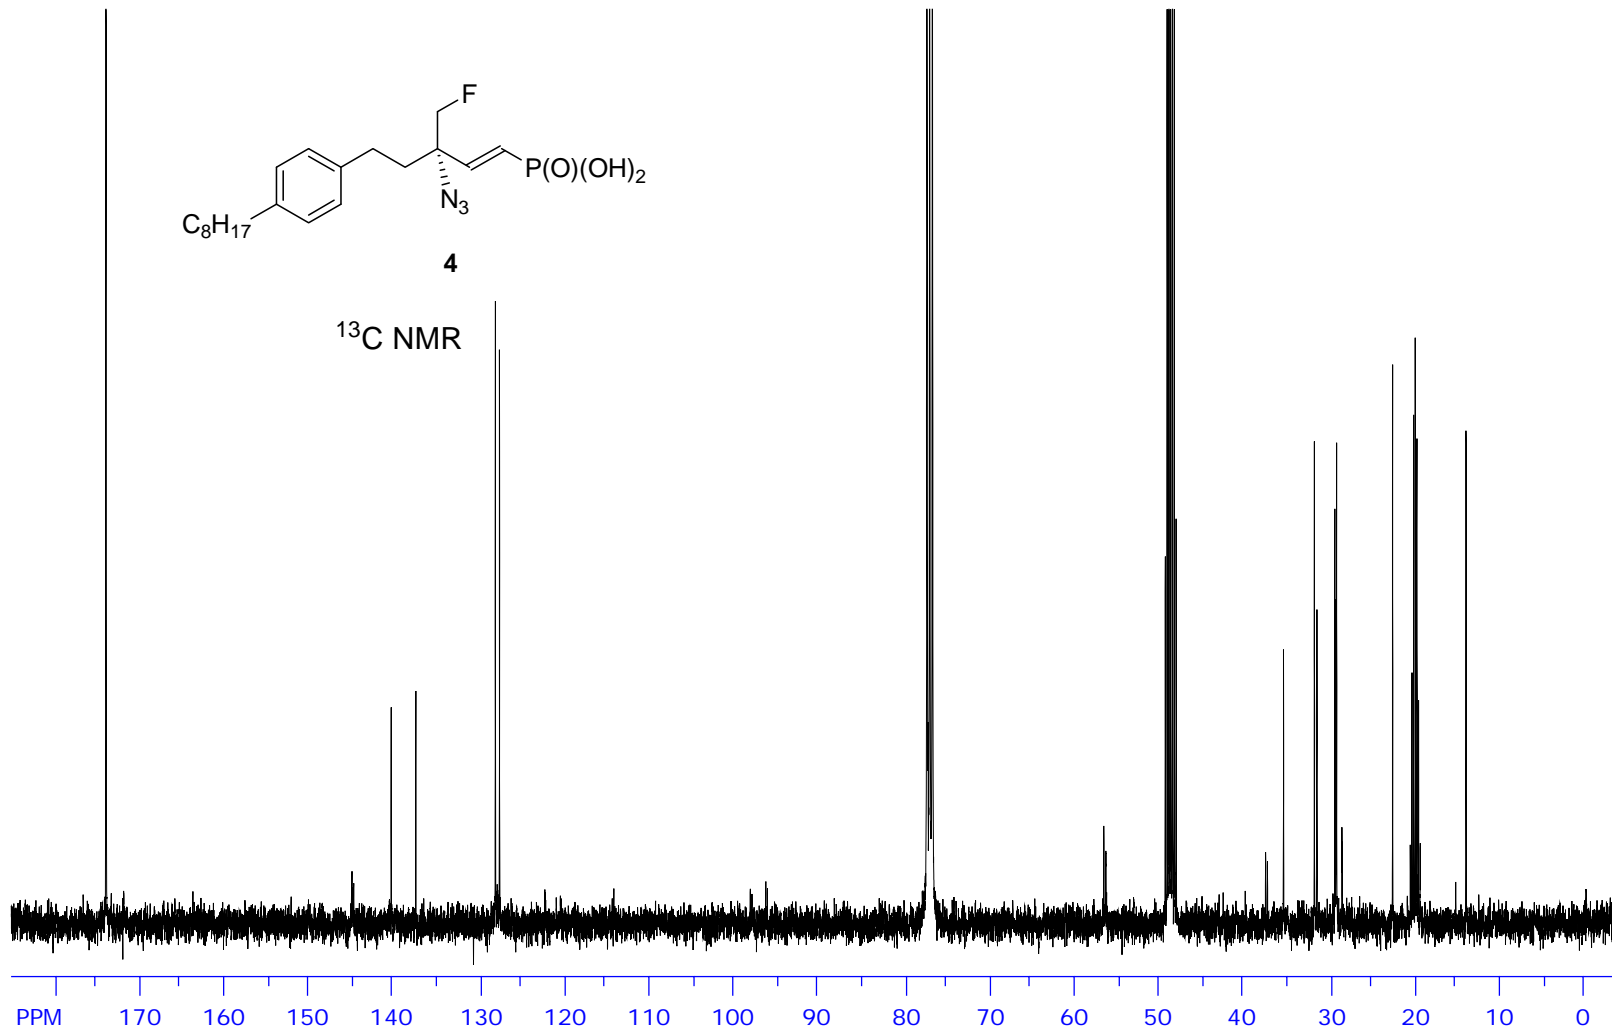

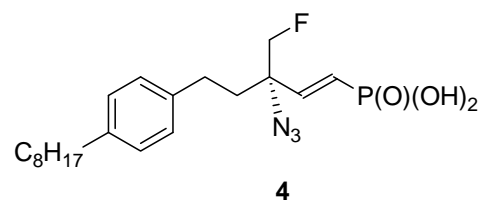

$^{31}\text{P}$  NMR

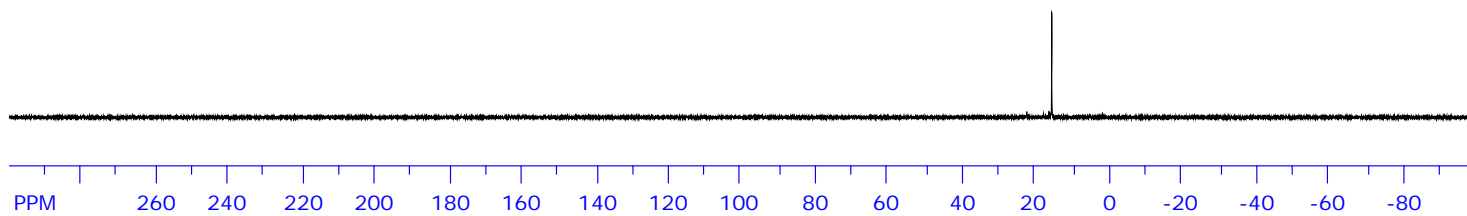

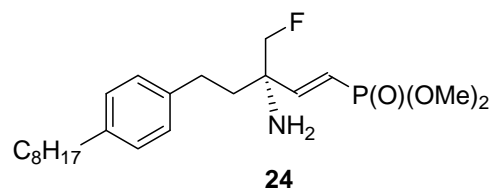

<sup>1</sup>H NMR

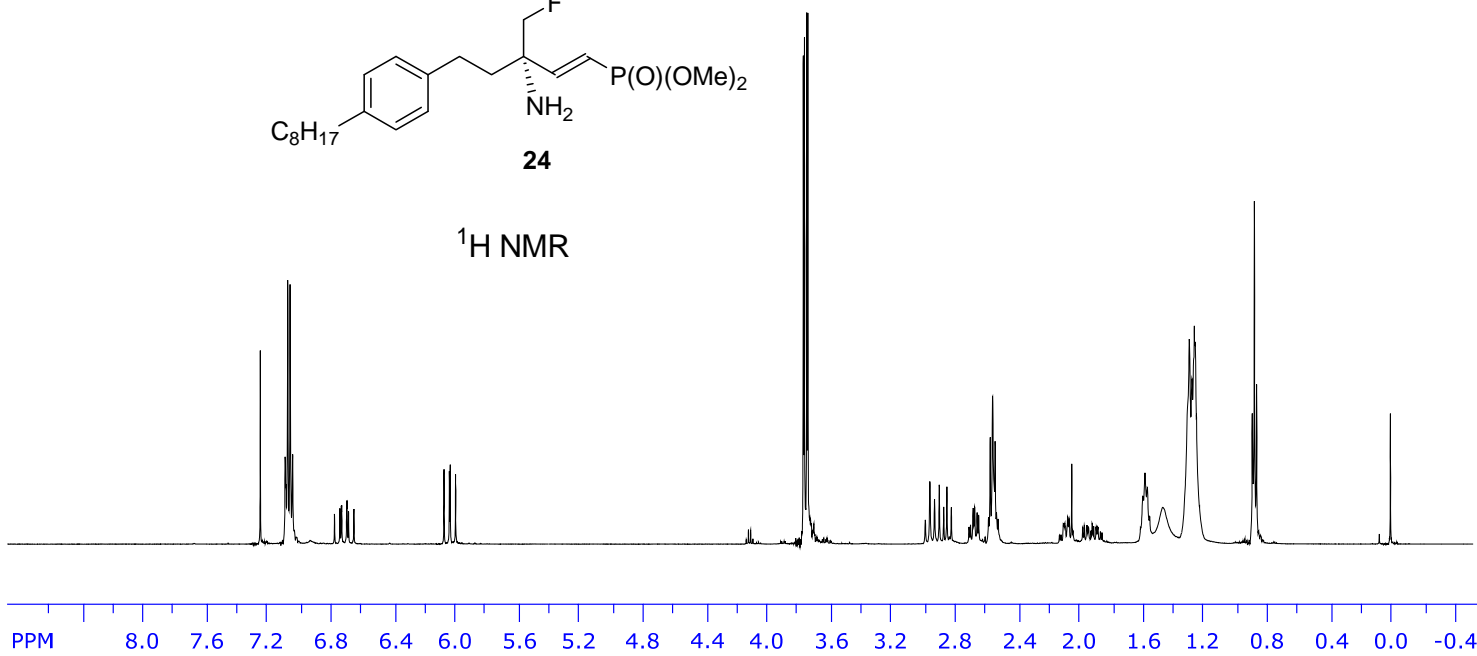

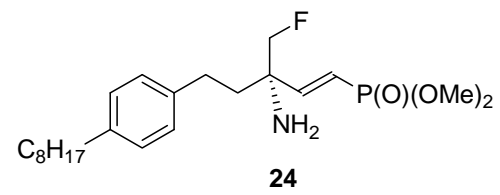

<sup>13</sup>C NMR

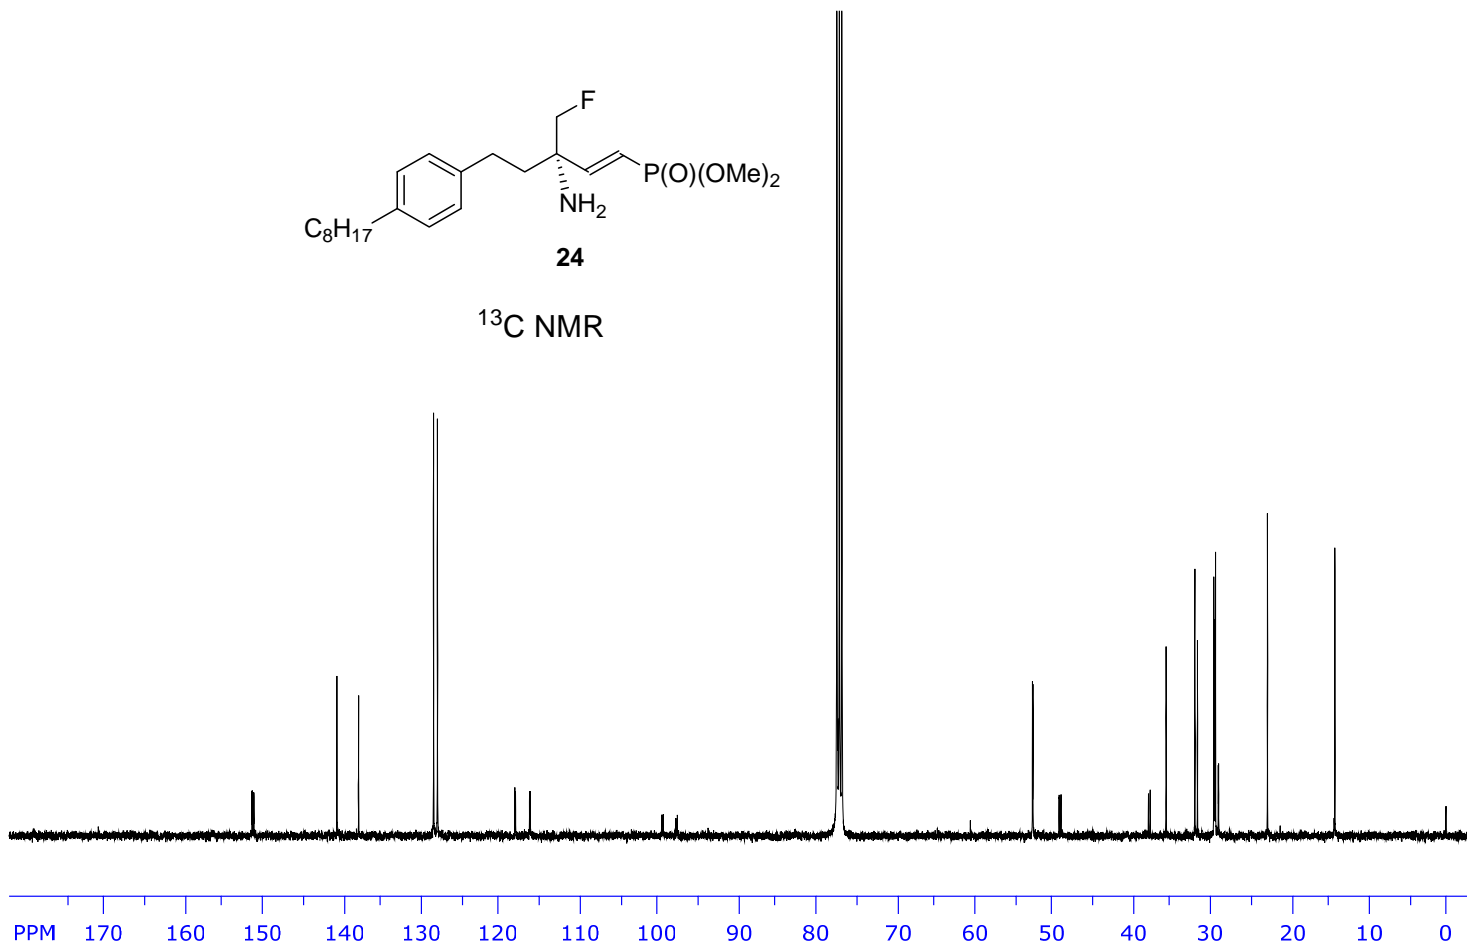

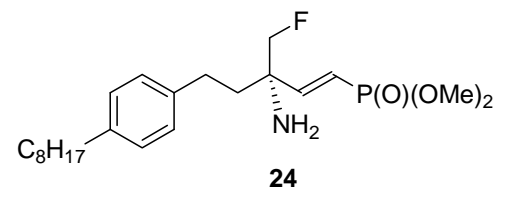

<sup>19</sup>F NMR

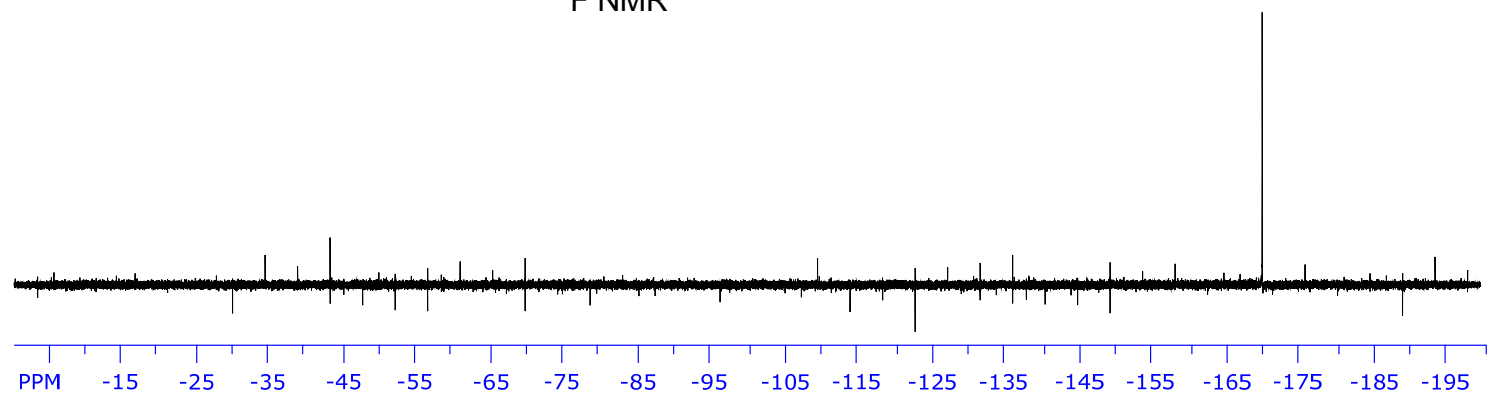

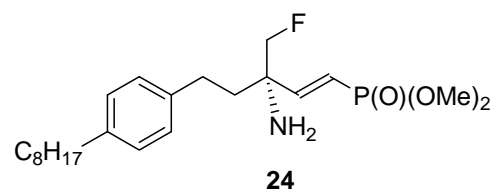

<sup>31</sup>P NMR

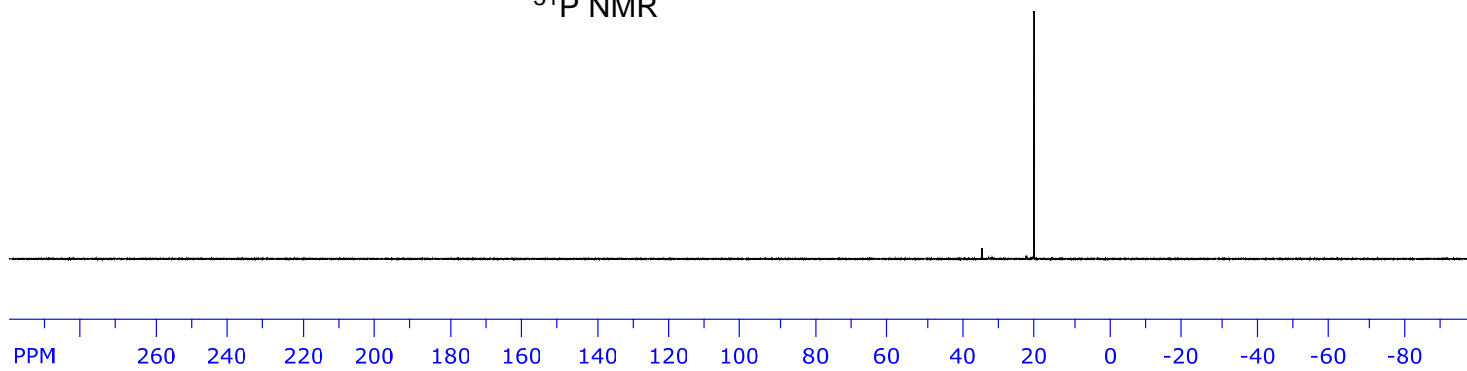

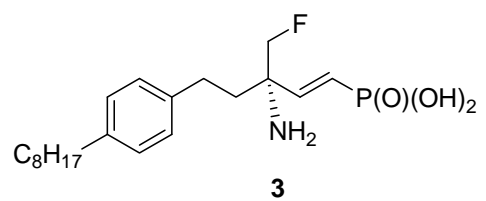

<sup>1</sup>H NMR

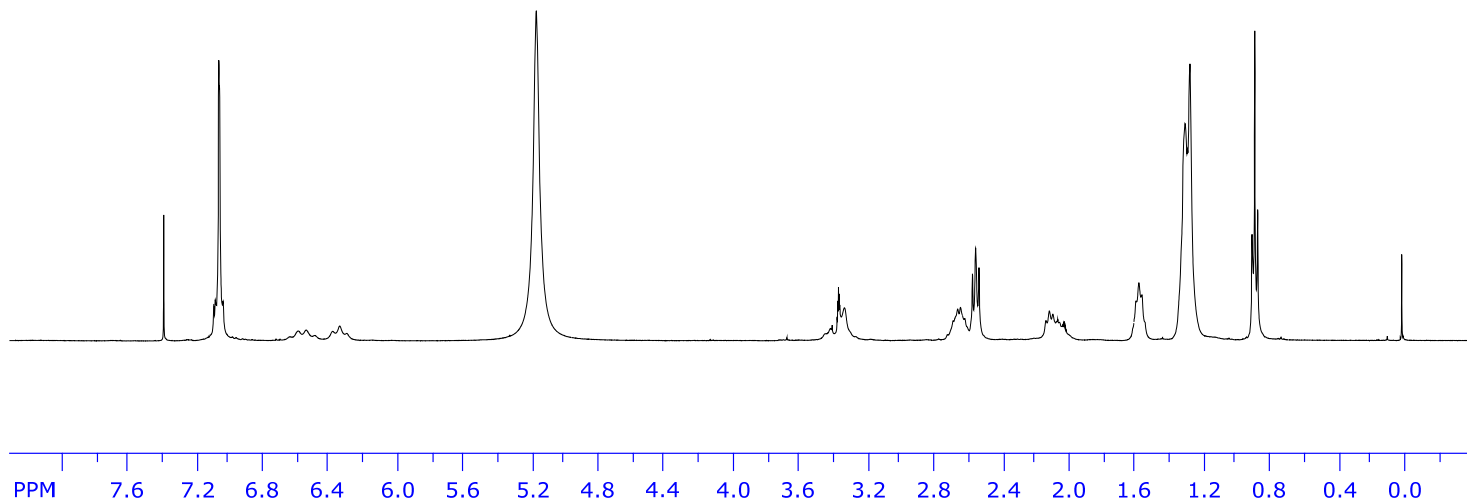

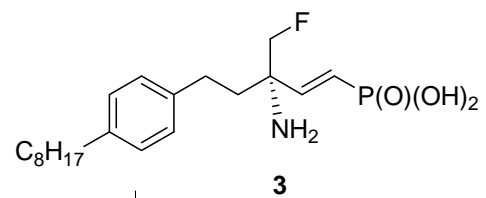

$^{13}\text{C}$  NMR

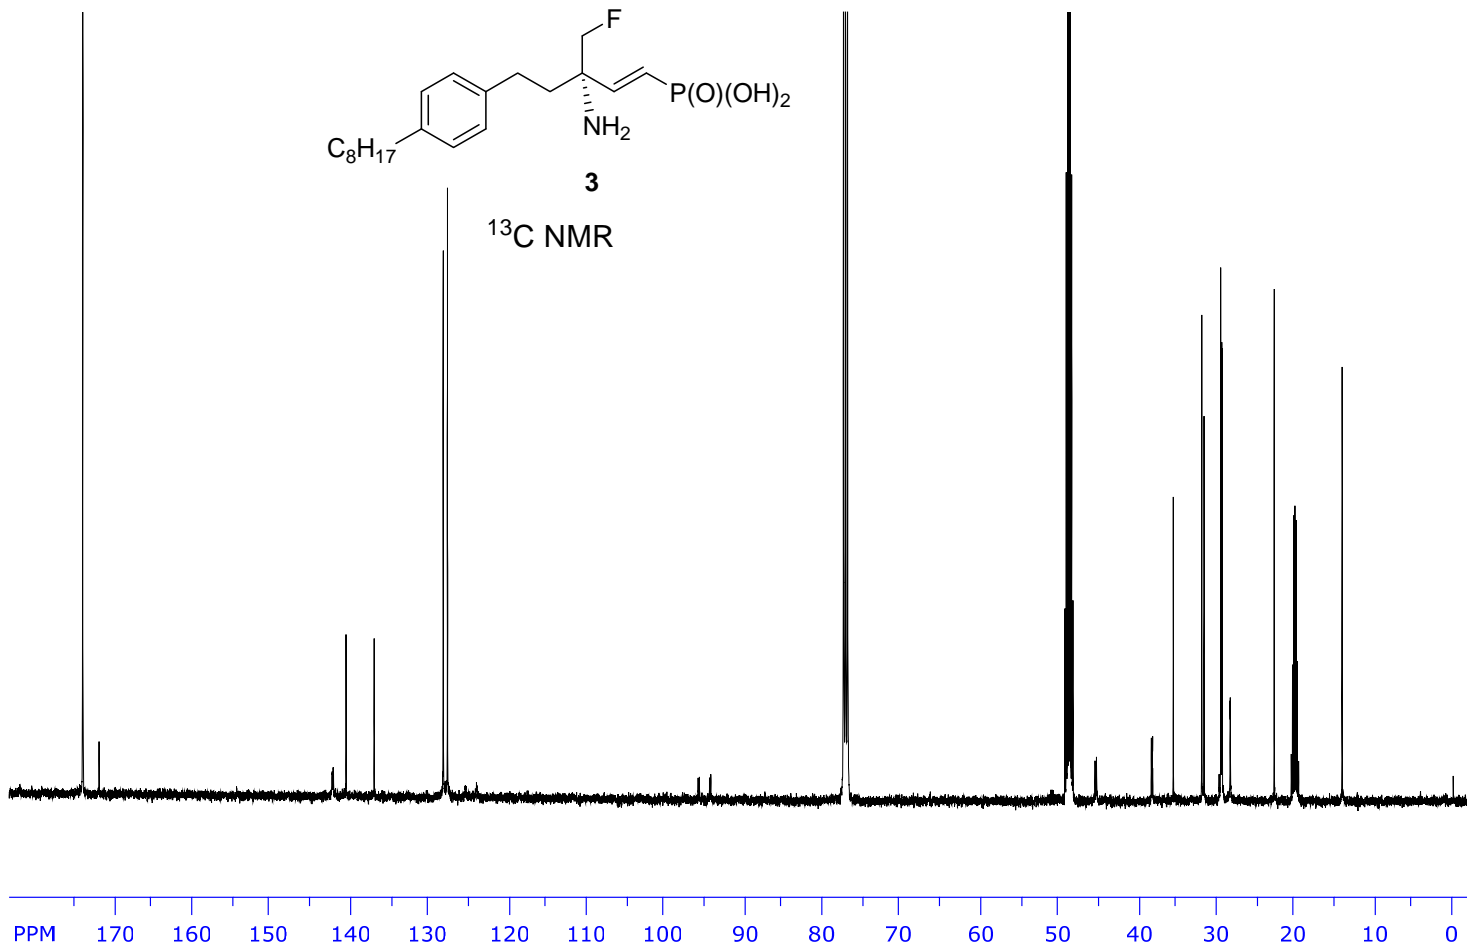



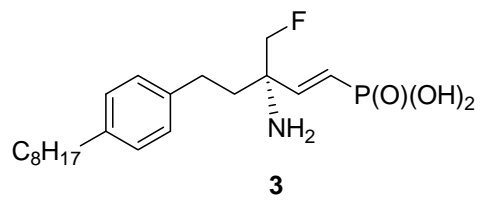

<sup>31</sup>P NMR

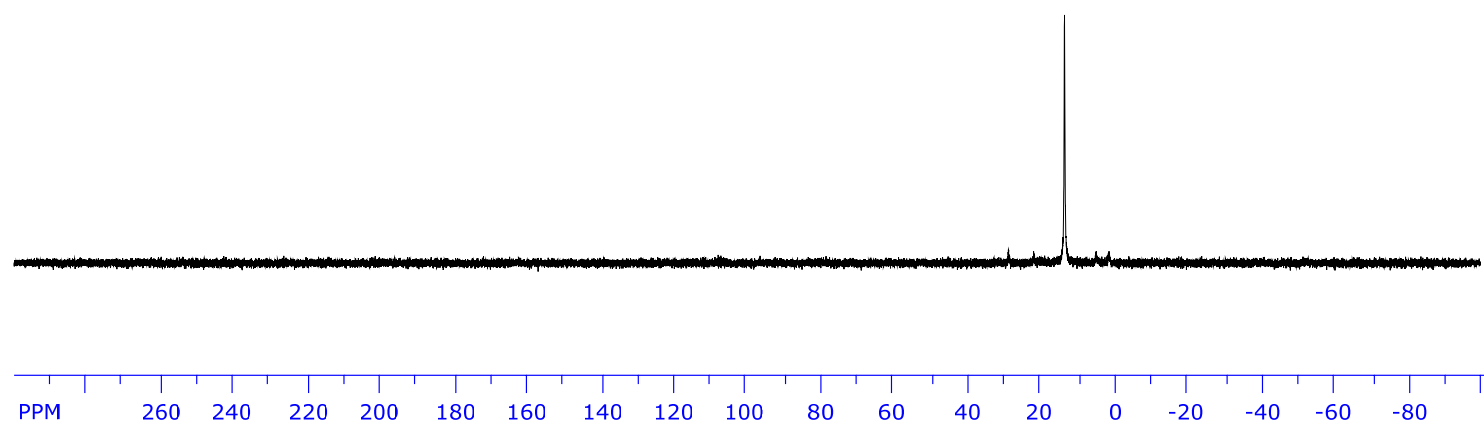

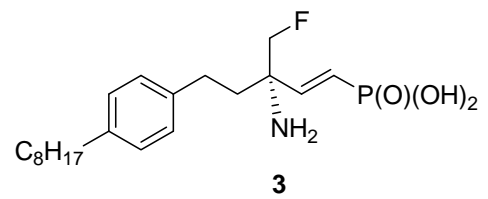

$^{19}\text{F}$  NMR

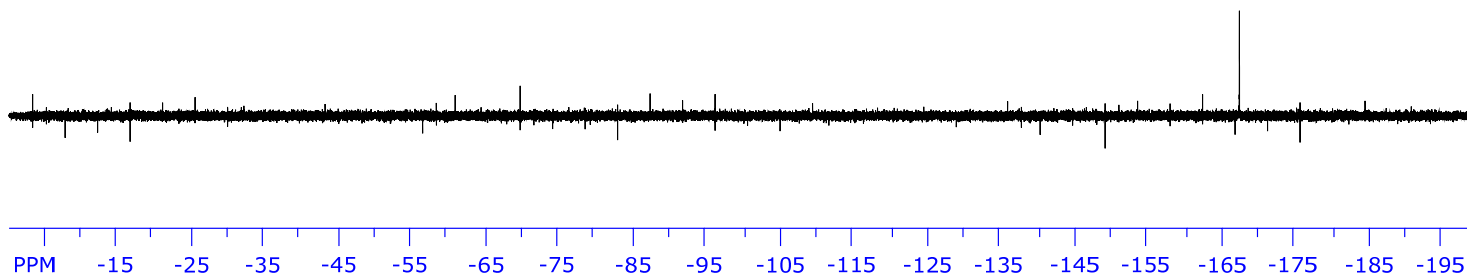

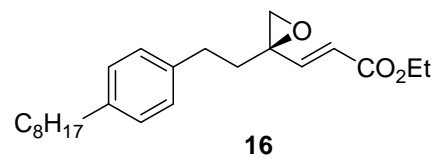

<sup>1</sup>H NMR

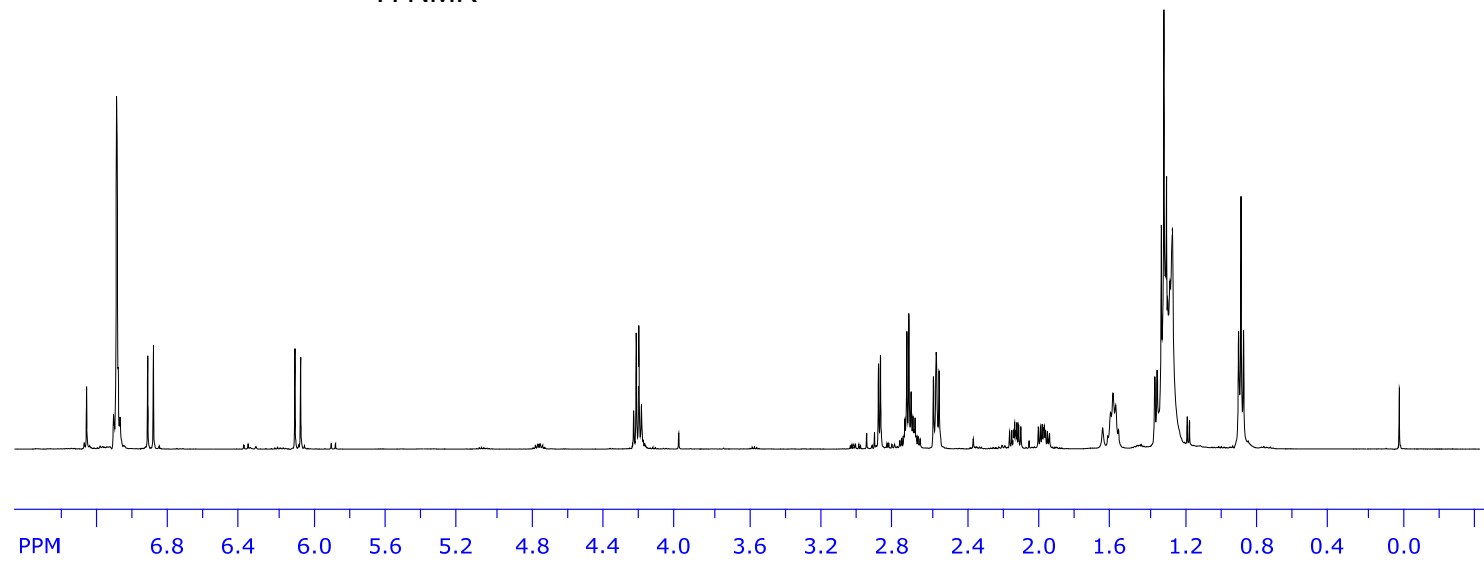

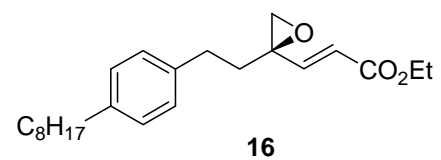

$^{13}\text{C}$  NMR

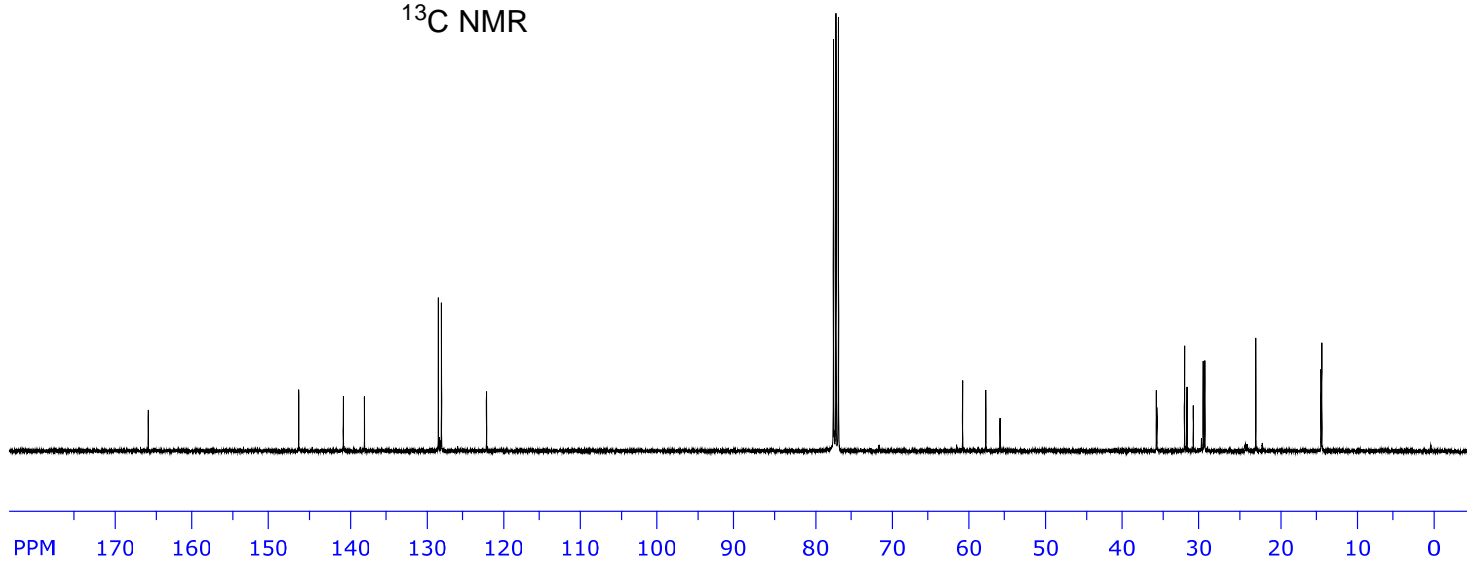

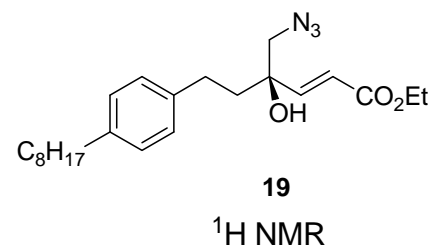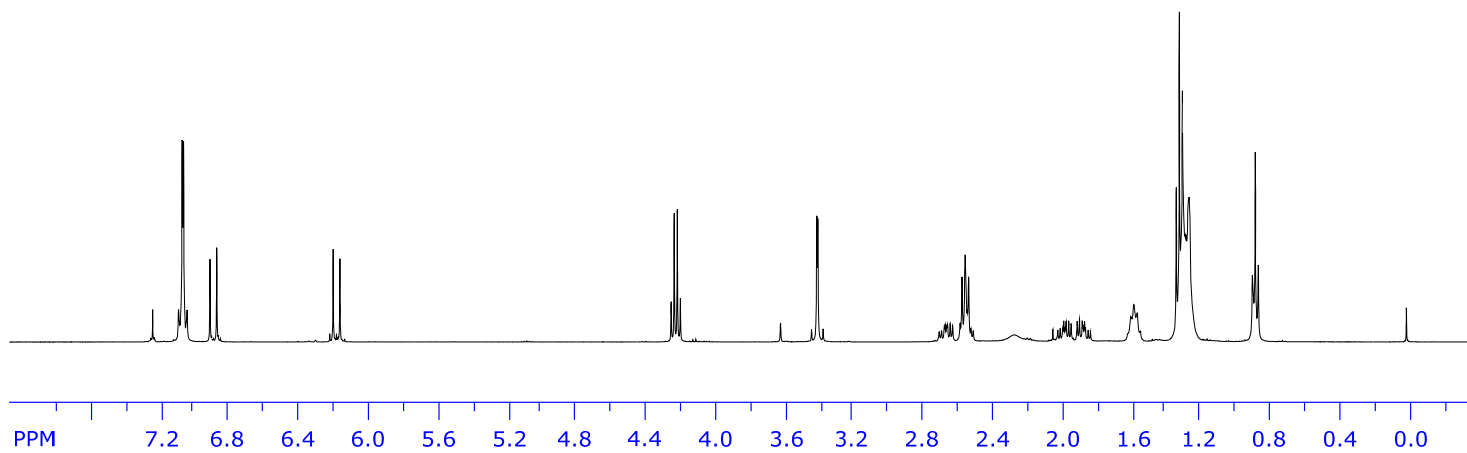

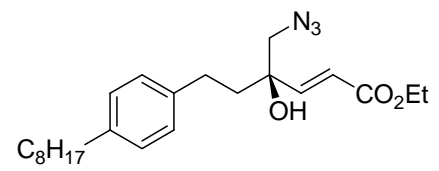

**19**  
<sup>13</sup>C NMR

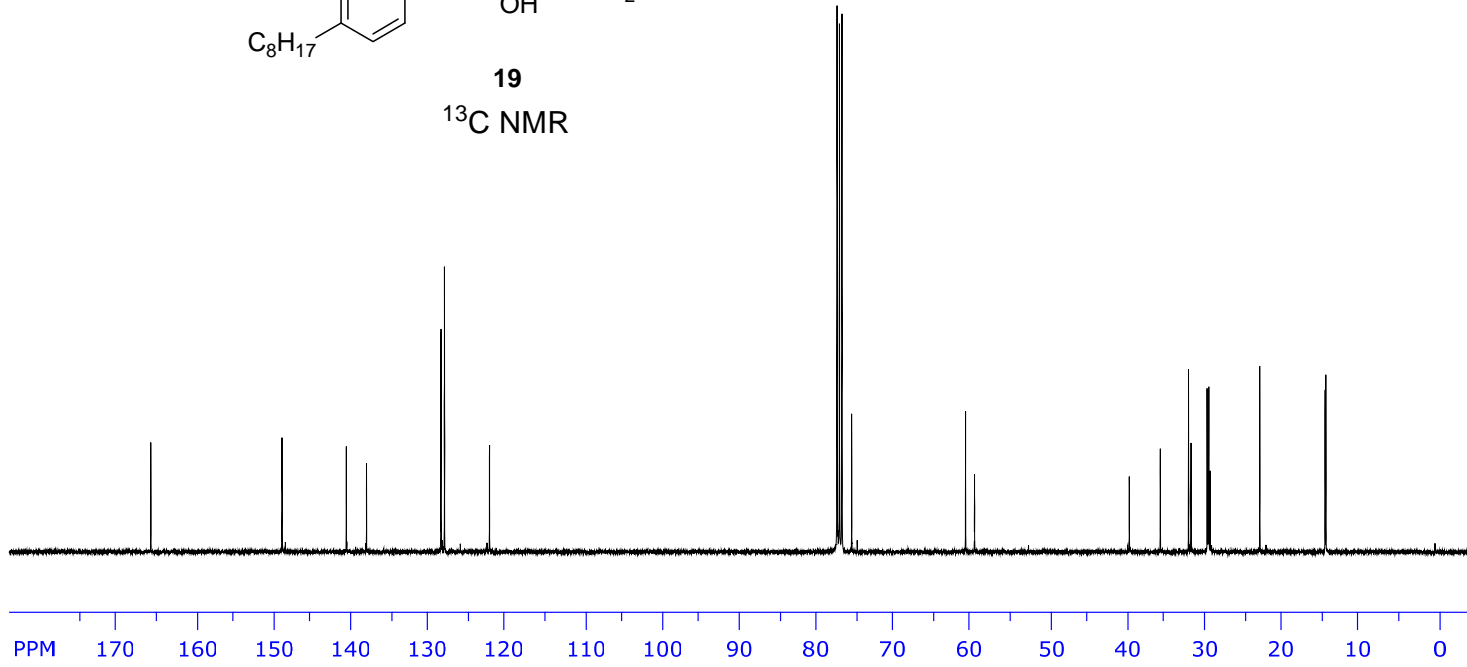

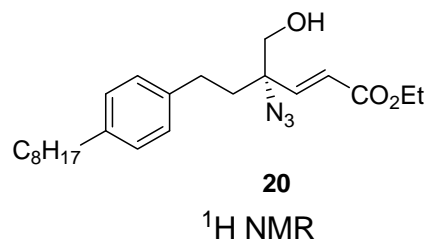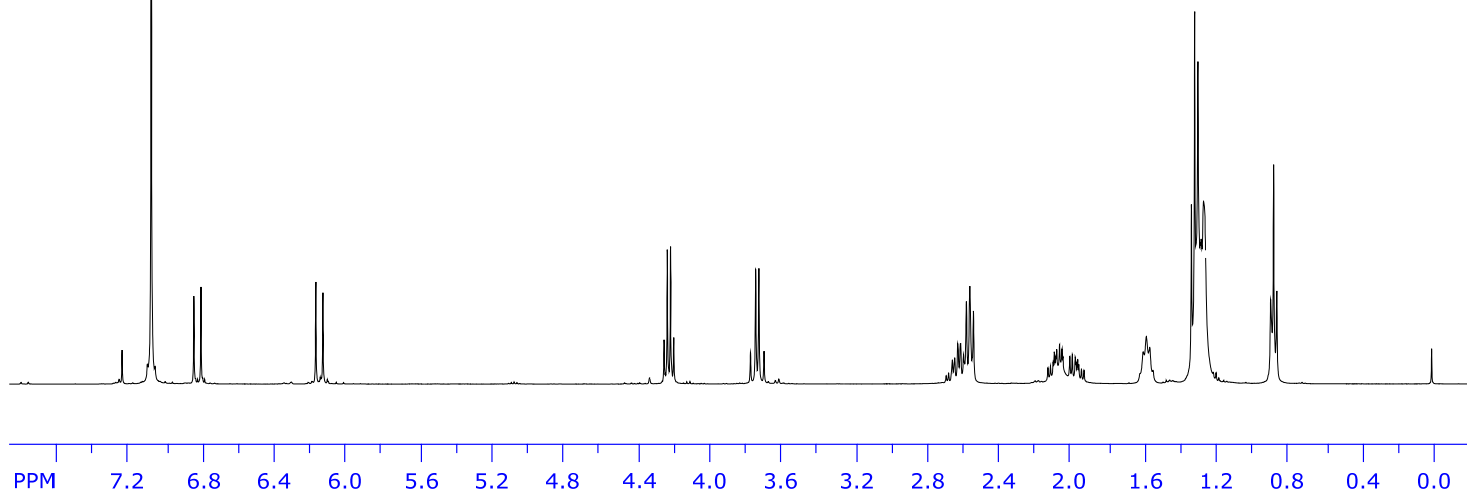

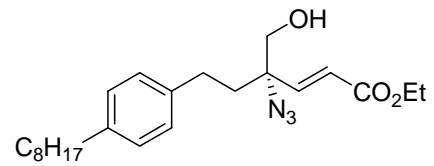

**20**

<sup>13</sup>C NMR

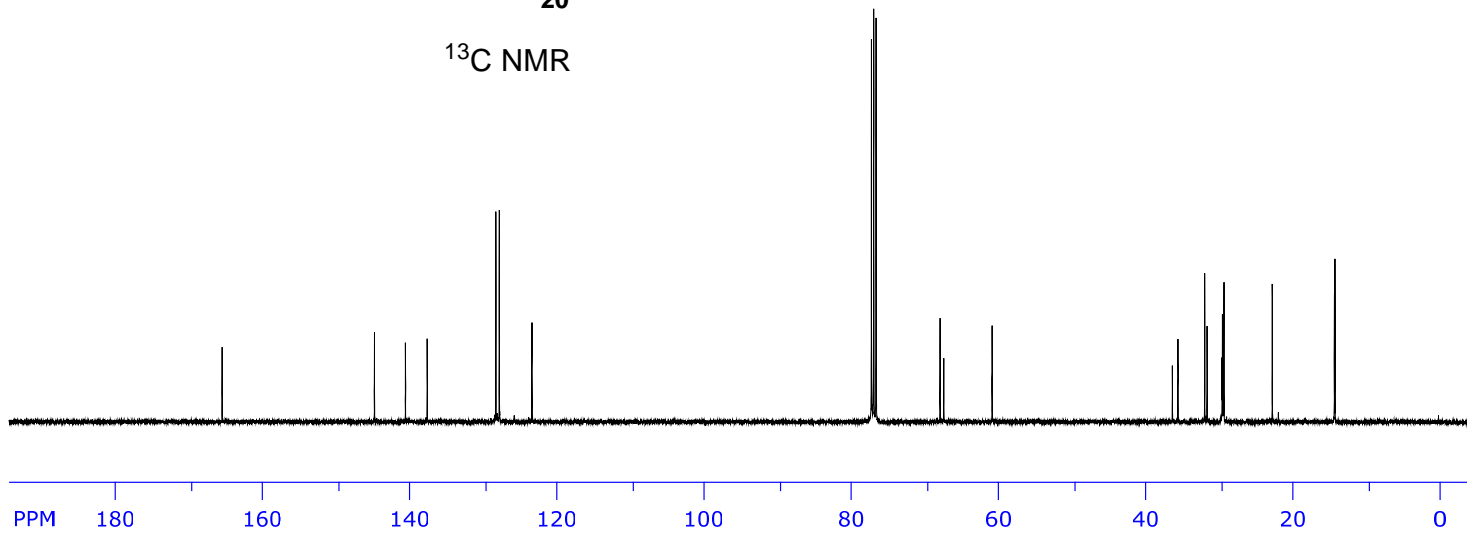



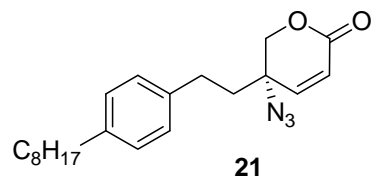

<sup>1</sup>H NMR

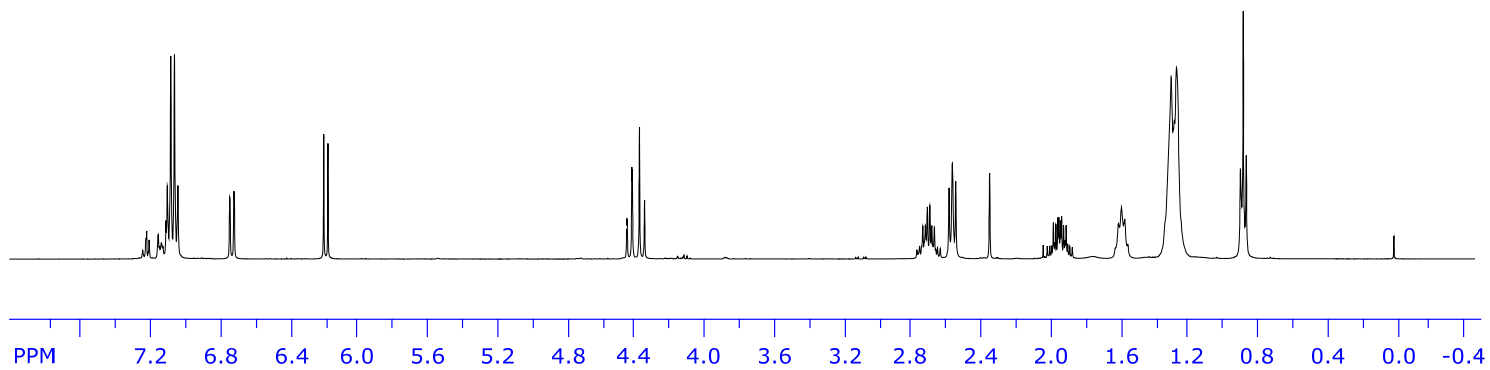

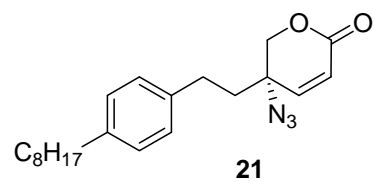

<sup>13</sup>C NMR

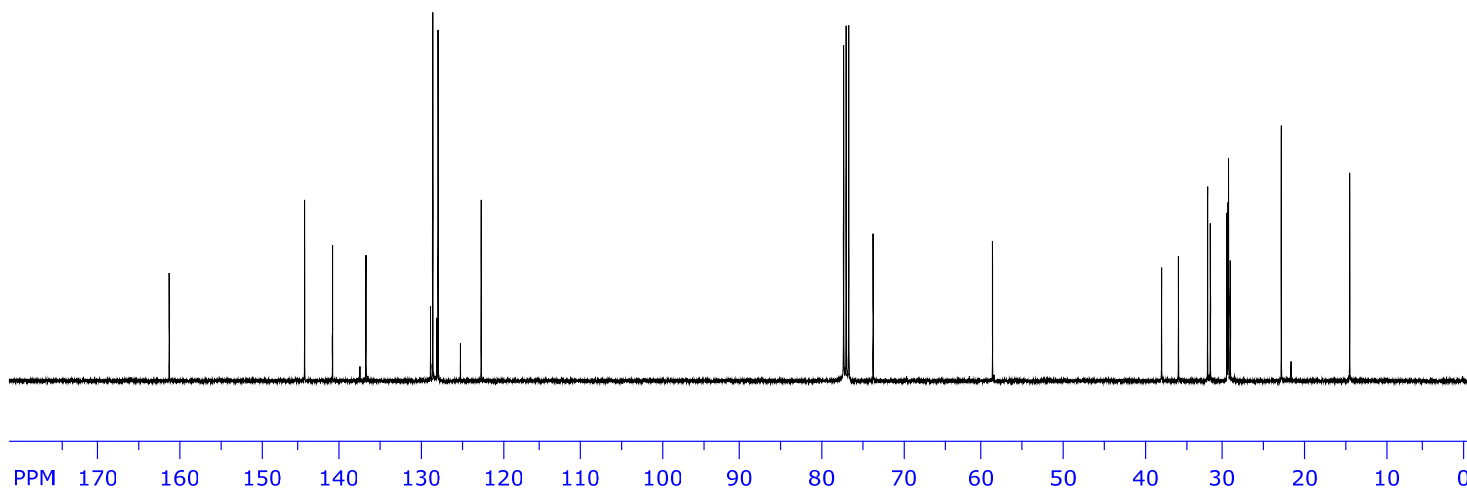

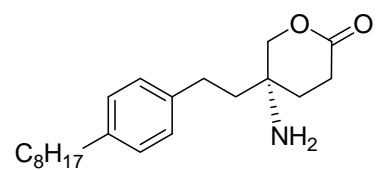

7  
<sup>1</sup>H NMR

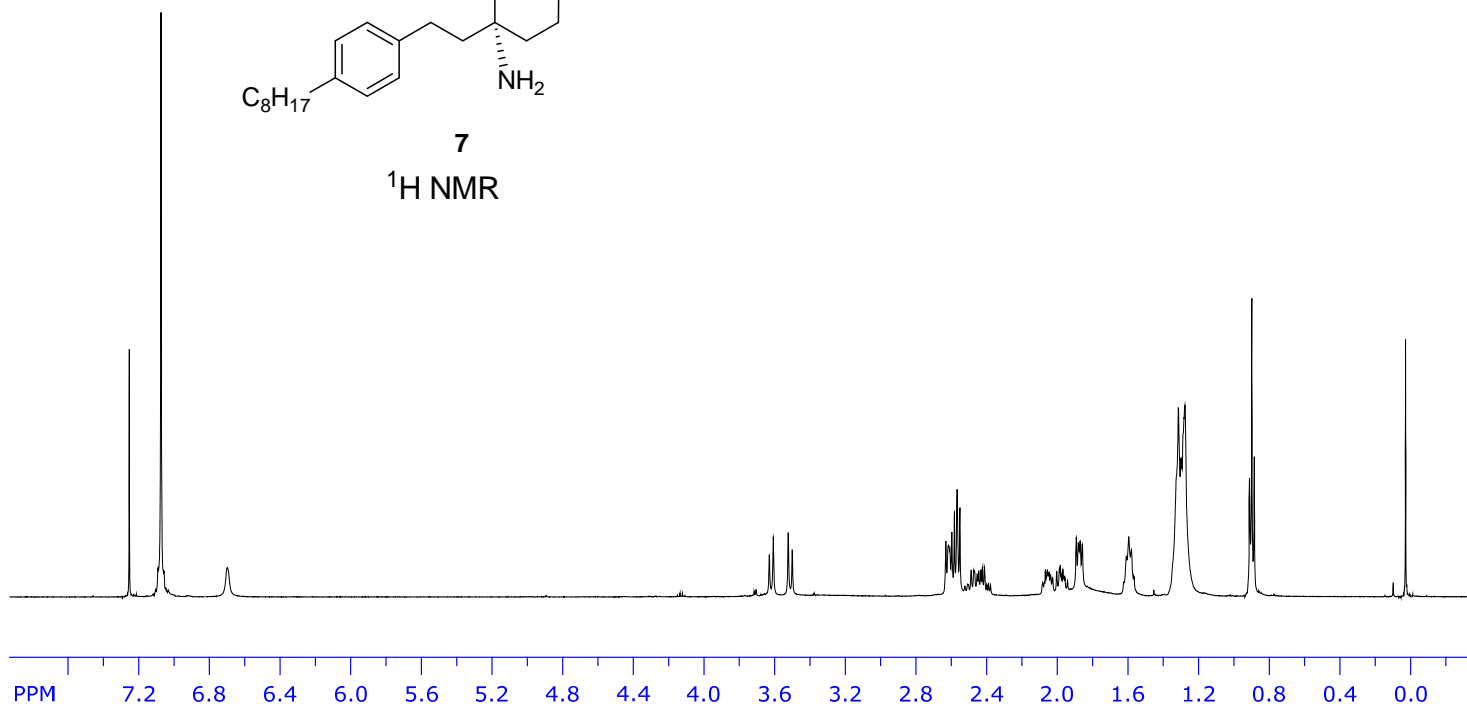

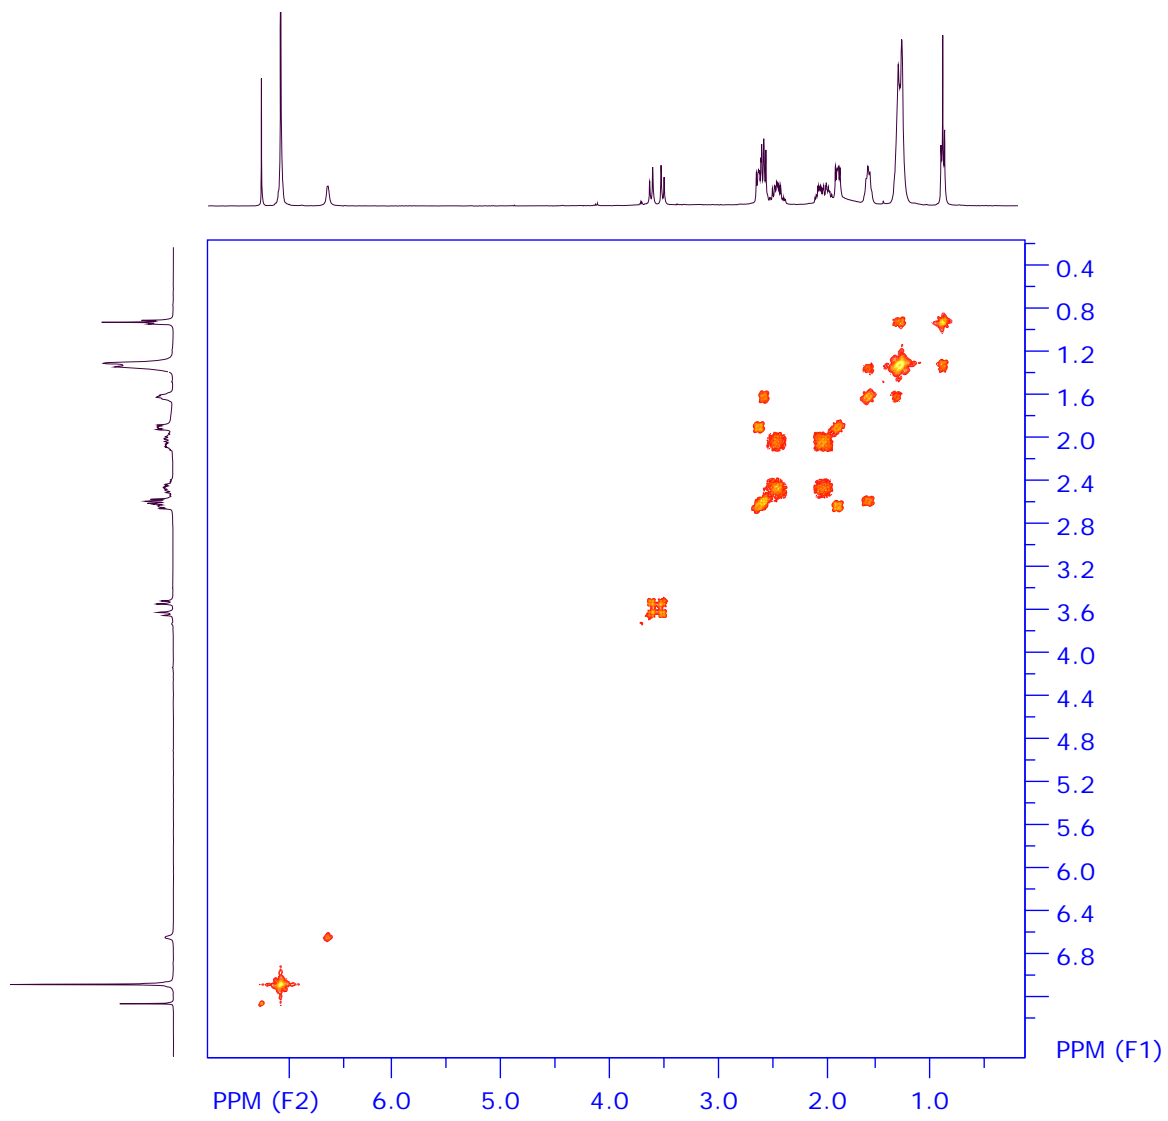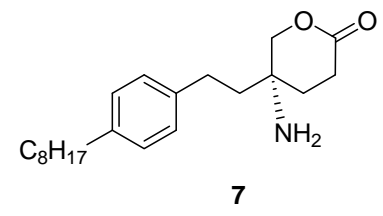

<sup>1</sup>H-<sup>1</sup>H COSY

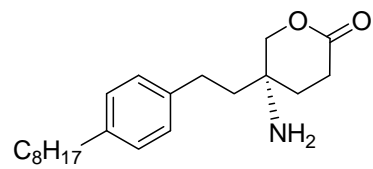

7

<sup>13</sup>C NMR

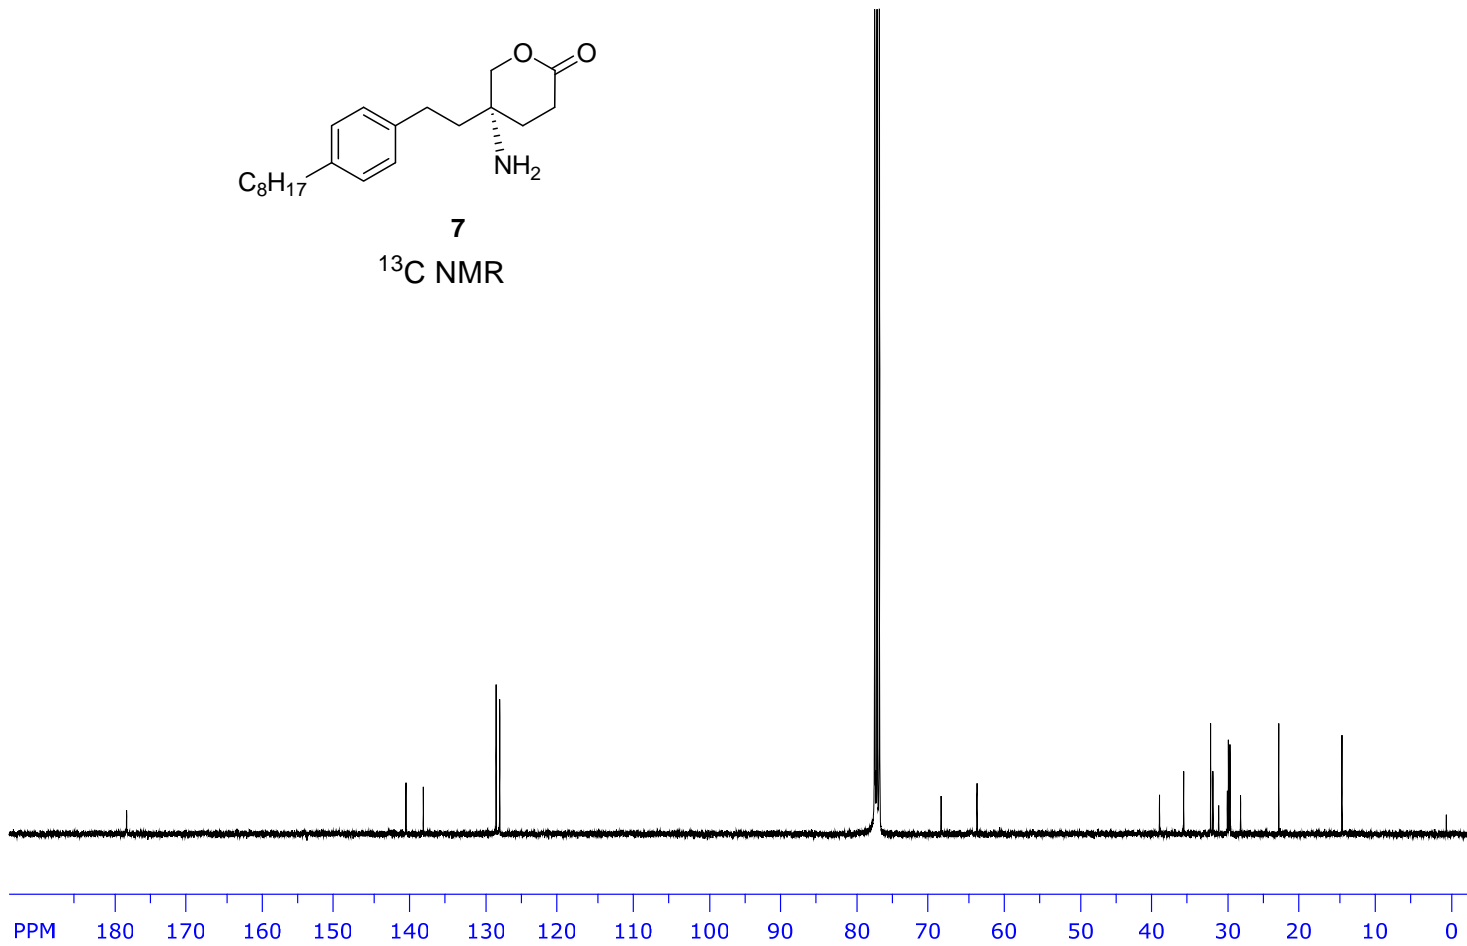

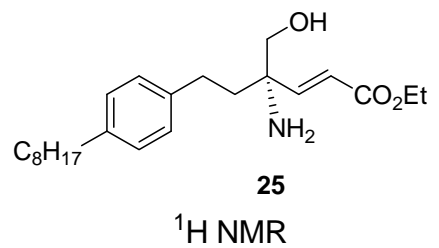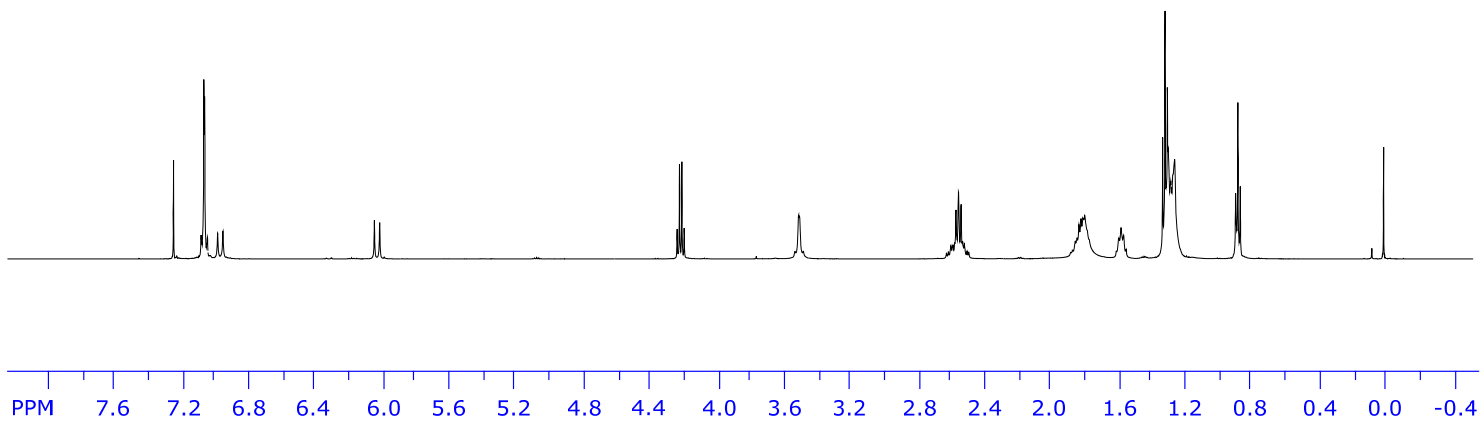

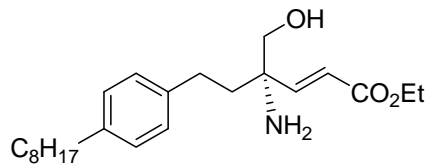

25

<sup>13</sup>C NMR

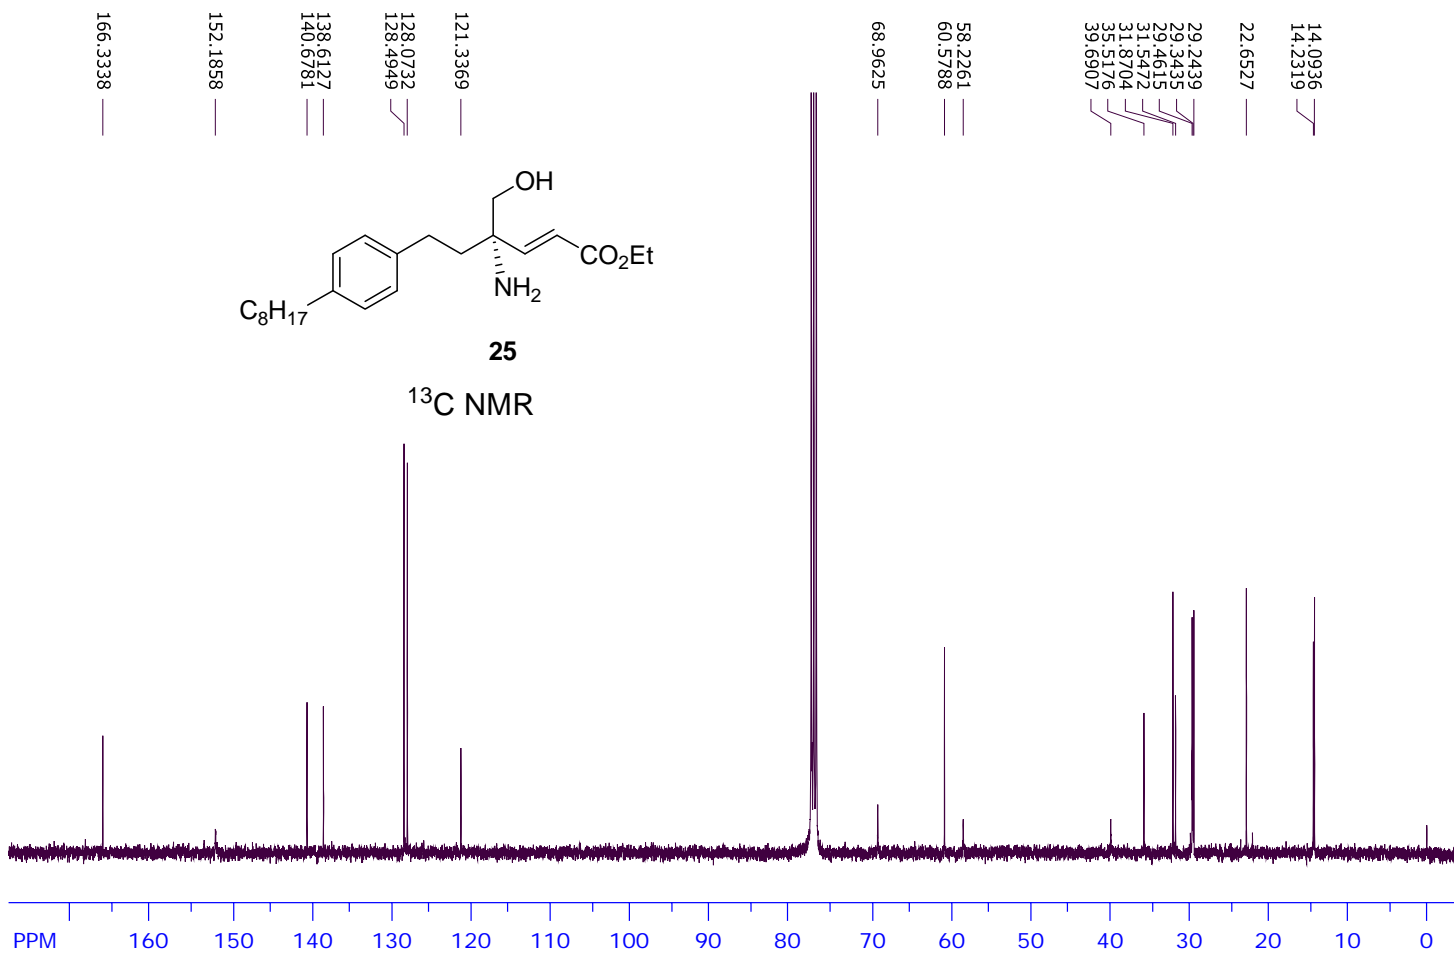

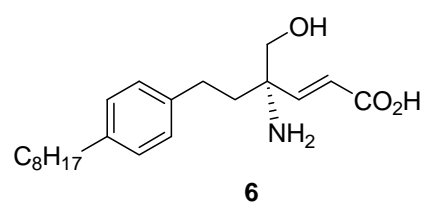

<sup>1</sup>H NMR

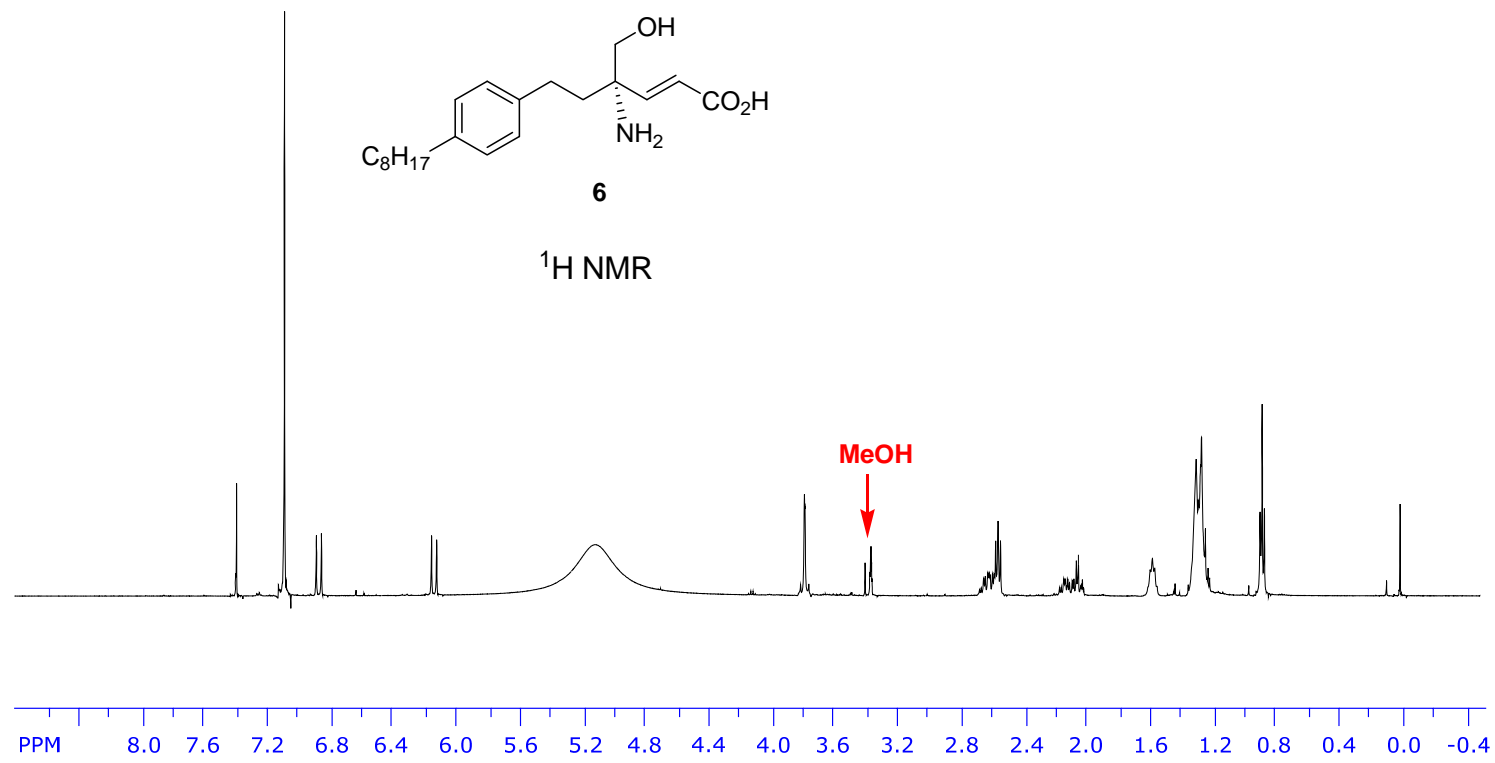



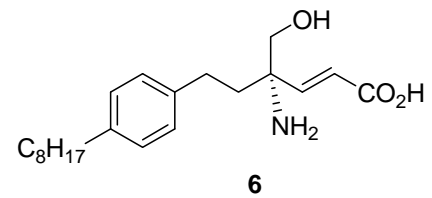

<sup>13</sup>C NMR

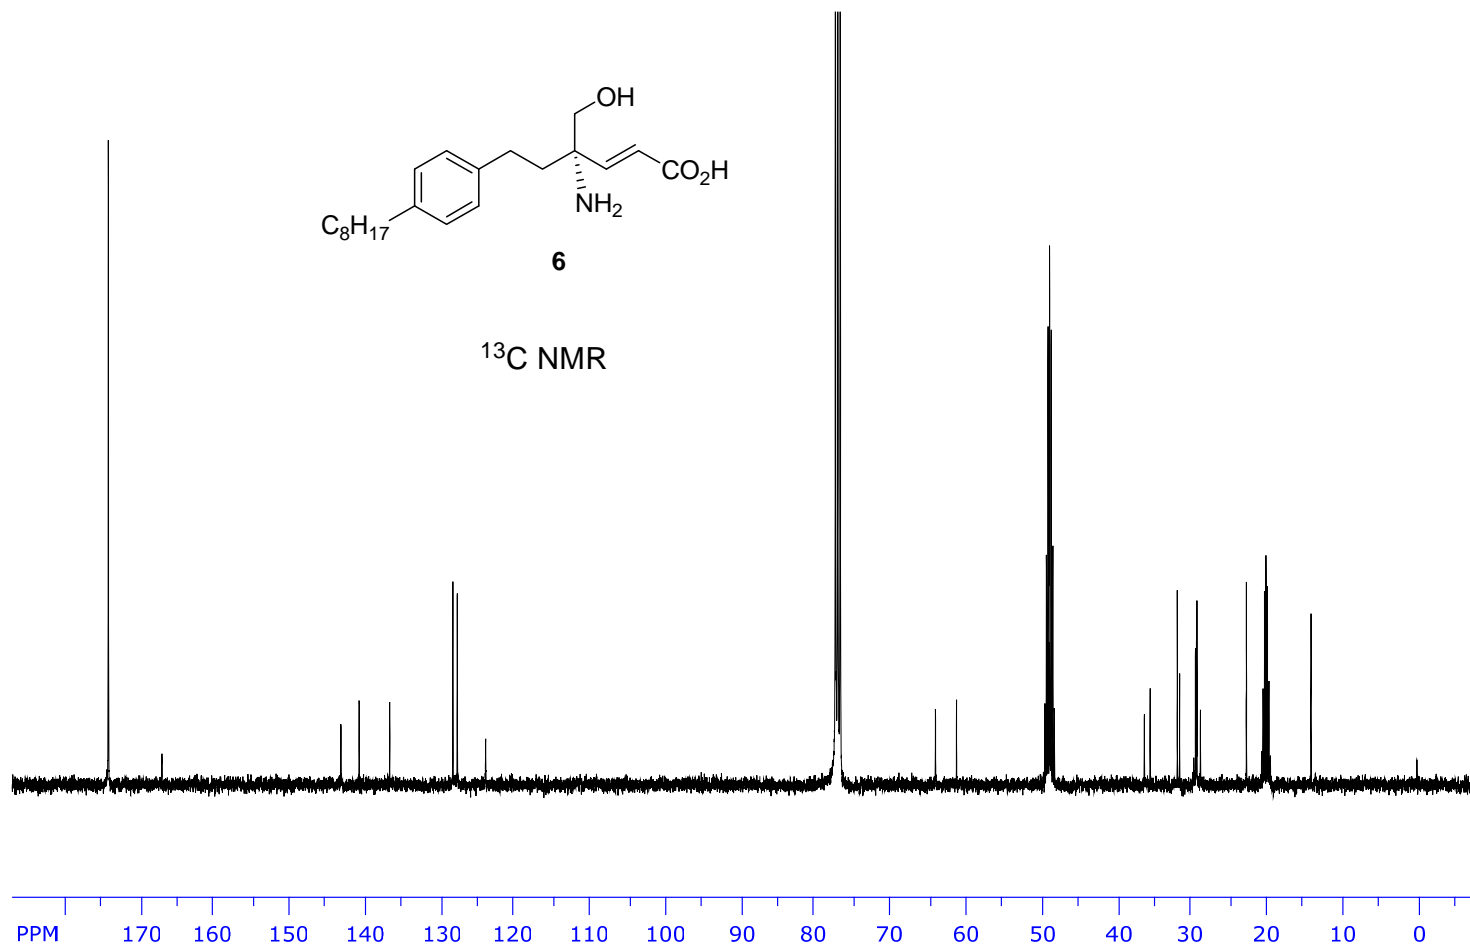

Supplement: NIHMS453291-supplement-01.pdf [file NIHMS453291-supplement-01.pdf]
